# Supplementary material for: Genome-wide CRISPR screening reveals genetic modifiers of mutant EGFR dependence in human NSCLC
Source: eLife. 2019 Nov 19;8:e50223. doi: 10.7554/eLife.50223 (PMC6927754; doi:10.7554/eLife.50223)
Supplement: Figure 2—source data 1. [file elife-50223-fig2-data1.xlsx]

## Sheet: Sheet1
Figure 2C
	sgAAVS			sgGNB2			sgLPAR2			sgPKN2			sgRIC8A			sgUSP22			sgYAP1
DMSO	96.6968	100.598	102.705	92.4617	101.287	96.6342	100.661	92.7121	98.032	98.8039	93.5674	102.204	104.562	84.6175	92.9416	91.7733	101.954	102.663	96.6759	92.1697	102.267
Erlotinib	98.5011	105.396	96.1028	2.82655	5.73876	6.89508	7.94433	11.1563	12.591	4.66809	2.18415	2.0985	0.278373	2.31263	2.0985	66.1028	52.848	60.5139	3.04068	1.19914	0.835118
Gefitinib	104.801	100.856	94.3436	4.25798	2.8804	10.8954	14.569	17.6164	12.5026	2.77604	8.36986	4.23711	0.459194	0.187852	2.12899	51.4715	47.6519	67.7103	1.83678	4.63369	2.90127
Figure 2F
	sgAAVS			sgARIH2			sgCUL5			sgRNF7			sgKCTD5			sgPDCD10			sgBTAF1
DMSO	94.2914	106.725	98.984	93.2888	99.8663	94.0107	100.588	92.9077	96.738	102.333	97.7206	89.3984	101.07	93.008	103.155	99.2848	92.9077	101.23	93.1283	98.8035	94.0107
Erlotinib	112.934	97.7088	89.357	407.169	422.838	381.079	415.151	389.209	413.378	360.31	386.031	374.575	263.045	251.441	281.522	200.591	245.824	237.768	392.461	370.88	346.563
Gefitinib	113.439	85.489	101.073	339.432	368.076	359.432	335.016	340.82	321.64	309.211	350.978	342.082	222.776	253.691	245.552	164.353	176.593	215.647	298.675	335.899	307.192
