# Supplementary material for: Genome-wide CRISPR screening reveals genetic modifiers of mutant EGFR dependence in human NSCLC
Source: eLife. 2019 Nov 19;8:e50223. doi: 10.7554/eLife.50223 (PMC6927754; doi:10.7554/eLife.50223)
Supplement: Figure 3—source data 1. [file elife-50223-fig3-data1.xlsx]

## Sheet: Sheet1
Figure 3E
	sgAAVS			sgRIC8A_1			sgRIC8A_2
DMSO	108.009	102.094	89.8973	87.942	104.831	105.76	107.593	98.452	87.9664
Erlotinib	100.855	94.3126	104.832	2.93091	1.5178	3.1926	1.25611	0.680391	3.24494
Gefitinib	104.419	99.6019	95.9793	2.42834	0.517516	0.955414	1.31369	0.875796	1.71178
Figure 3J
	sgAAVS			sgRIC8A_1			sgRIC8A_2
DMSO	110.133	102.49	87.3772	90.4746	102.564	108.06	110.683	92.398	108.11
Erlotinib	84.3137	101.734	113.952	1.16893	0.414781	0.113122	0.075415	0.339367	0.603318
Gefitinib	98.307	110.06	91.6329	0.335805	0.67161	0.713586	0.251854	0.923464	0.713586
Figure 3O
	sgAAVS			sgRIC8A_1			sgRIC8A_2
DMSO	105.003	99.2911	95.7059	80.1904	93.1942	89.6293	82.9654	80.9601	87.5228
EGF816	102.176	90.6177	107.206	19.5601	18.5307	17.431	16.9162	16.3547	15.4188
