# Supplementary material for: Genome-wide CRISPR screening reveals genetic modifiers of mutant EGFR dependence in human NSCLC
Source: eLife. 2019 Nov 19;8:e50223. doi: 10.7554/eLife.50223 (PMC6927754; doi:10.7554/eLife.50223)
Supplement: Figure 4—source data 1. [file elife-50223-fig4-data1.xlsx]

## Sheet: Sheet1
Figure 4C
HEK293A	sgAAVS				sgRIC8A_1				sgRIC8A_2
ANKRD1	0.988825	1.0102	1.02029	0.972956	0.14213	0.150094	0.160073	0.16116	0.142295	0.152201	0.151121	0.142227
CTGF	1.07203	0.867567	1.02553	1.01158	0.224229	0.21004	0.211114	0.18884	0.193009	0.22346	0.190056	0.202022
CYR61	0.989353	0.980681	1.00236	0.995444	0.255024	0.301122	0.299443	0.403369	0.35663	0.349963	0.302289	0.310002
Figure 4E
HCC827	sgAAVS				sgRIC8A_1				sgRIC8A_2
ANKRD1	0.971362	1.08446	1.04189	0.911134	0.068867	0.063448	0.065303	0.056956	0.057287	0.053625	0.044896	0.046798
CTGF	1.00724	0.974599	0.99896	1.01975	0.351035	0.346266	0.271776	0.267254	0.207188	0.242745	0.181149	0.246866
CYR61	0.957593	0.949922	1.08337	1.01474	0.194157	0.180136	0.193501	0.191884	0.159424	0.137925	0.147952	0.169542
PC9	sgAAVS				sgRIC8A_1				sgRIC8A_2
ANKRD1	1.00126	1.0004	0.888567	1.12354	0.19158	0.17453	0.171677	0.202046	0.223842	0.198544	0.282361	0.235584
CTGF	1.05117	0.994395	1.03438	0.924885	0.116158	0.11747	0.118181	0.117871	0.125906	0.106687	0.07772	0.119432
CYR61	0.969658	0.99161	0.935541	1.11167	0.178604	0.172907	0.184821	0.211786	0.209728	0.207816	0.189309	0.209068
HCC4006	sgAAVS				sgRIC8A_1				sgRIC8A_2
ANKRD1	0.988825	1.02103	1.02857	0.962956	0.197867	0.200957	0.202596	0.206116	0.119524	0.121032	0.122131	0.122651
CTGF	1.1074	0.75669	1.11355	1.07168	0.542291	0.504986	0.536458	0.545097	0.578271	0.565823	0.576336	0.562888
CYR61	0.989432	0.980509	1.03556	0.995374	0.102376	0.096097	0.099421	0.097781	0.096534	0.099071	0.101959	0.098386
NCI-H3255	sgAAVS				sgRIC8A_1				sgRIC8A_2
ANKRD1	1.00691	0.991967	1.04751	0.95577	0.707417	0.864647	0.792575	0.648901	0.653158	0.737923	0.667609	0.741375
CTGF	1.04542	1.06849	0.93617	0.956276	0.491405	0.601929	0.528001	0.546416	0.434884	0.474588	0.469682	0.473773
CYR61	1.05017	1.02344	0.987614	0.942082	0.46865	0.441399	0.437155	0.447799	0.394991	0.398165	0.431168	0.395344
NCI-H1975	sgAAVS				sgRIC8A_1				sgRIC8A_2
ANKRD1	0.978882	1.01032	1.02286	0.972956	0.197867	0.200957	0.202596	0.206116	0.29524	0.321032	0.322131	0.322651
CTGF	1.07403	0.85669	1.01355	1.01681	0.442291	0.404986	0.336458	0.345097	0.378271	0.365823	0.376336	0.356289
CYR61	0.99432	0.80509	1.01356	0.948954	0.302376	0.296097	0.299421	0.297781	0.296534	0.299071	0.301959	0.398386
Figure 4G
HCC827-YAP-5SA	sgAAVS				sgRIC8A_1				sgRIC8A_2
ANKRD1	0.999883	1.03521	1.12857	0.962956	1.07403	0.975669	1.00136	1.00072	0.907403	0.975669	1.11553	1.07168
CTGF	1.10174	0.85669	1.13553	1.07168	0.96025	0.997567	0.992136	1.07168	0.9455	0.996757	1.00036	1.00007
CYR61	0.989432	0.980509	1.03556	0.989954	0.97074	1.1003	0.9633	1.1133	1.07403	0.968567	1.00136	1.00172
Figure 4J	Vector, sgAAVS			Vector, sgRIC8A_1			Vector, sgRIC8A_2			YAP-5SA, sgAAVS			YAP-5SA, sgRIC8A_1			YAP-5SA, sgRIC8A_2
DMSO	109.129	98.5919	92.2788	88.9697	99.3429	96.4328	95.5879	90.1666	88.43	113.119	94.1328	97.4185	85.9657	108.543	104.013	107.228	88.1483	93.9451
Erlotinib	102.612	90.7329	106.655	5.87616	2.65375	4.17018	1.51643	2.90649	4.54928	282.94	254.128	241.428	258.93	247.81	265.501	231.95	242.755	250.59
Gefitinib	110.183	90.47	99.3473	1.63185	4.43864	3.06788	6.00522	2.74151	1.43603	263.055	250.196	241.449	268.93	250.914	244.517	257.311	262.272	225.588
