# Supplementary material for: Genome-wide CRISPR screening reveals genetic modifiers of mutant EGFR dependence in human NSCLC
Source: eLife. 2019 Nov 19;8:e50223. doi: 10.7554/eLife.50223 (PMC6927754; doi:10.7554/eLife.50223)
Supplement: Figure 5—source data 1. [file elife-50223-fig5-data1.xlsx]

## Sheet: Sheet1
Figure 5E
% DTP cells	sgAAVS			sgARIH2_1			sgARIH2_2
Erlotinib	3.33333	2.72727	2.92929	5.83468	6.80713	8.75203	6.45695	5.96026	7.94702
Gefitinib	1.71717	2.72727	2.47475	5.83468	7.77958	5.34846	4.4702	7.45033	5.46358
Figure 5G
	sgAAVS			sgARIH2_1			sgARIH2_2
DMSO	97.674	94.8703	107.456	96.7447	95.7996	100.809	90.3497	104.321	98.3514
Erlotinib	100.093	76.9087	122.998	412.197	447.579	394.134	431.378	387.896	448.976
Gefitinib	99.4595	85.2252	115.315	423.514	452.793	394.414	452.162	426.396	419.64
Figure 5J
	DMSO			Erlotinib			Gefitinib
sgAAVS/RFP	2.35	0.68	1.47	0.45	2.22	1.53	2.5	0.63	1.28
sgARIH2/RFP	3.15	2.21	1.69	29.5	31.7	26.9	37.9	29.1	26.4
