# Supplementary material for: Genome-wide CRISPR screening reveals genetic modifiers of mutant EGFR dependence in human NSCLC
Source: eLife. 2019 Nov 19;8:e50223. doi: 10.7554/eLife.50223 (PMC6927754; doi:10.7554/eLife.50223)
Supplement: Figure 6—source data 1. [file elife-50223-fig6-data1.xlsx]

## Sheet: Sheet1
Figure 6C
	sgAAVS				sgARIH2_1				sgARIH2_2
METAP2	1.1	0.98578	0.908934	1.0146	1.10329	0.782352	0.884029	1.23314	1.26556	0.996799	0.959835	0.987669
ALDOA	1.04542	0.98057	1.06598	0.915123	1.21822	0.875468	0.94693	0.904095	0.864628	0.980253	0.883118	1.19367
PSAT1	0.948862	0.962407	1.11883	0.978755	1.17238	1.18363	1.02353	1.07968	1.02191	1.03542	1.04057	1.01926
Figure 6F
	Vector			HA-METAP2
DMSO	92.5348	96.5435	110.922	94.7672	101.608	105.569
Erlotinib	111.724	88.3289	99.947	274.536	323.554	337.401
Gefitinib	92.1168	120	87.8832	288.321	312.117	241.606
Figure 6N
	Vector			HA-ALDOA			HA-PSAT1
DMSO	95.3341	94.0031	105.467	96.8201	94.7886	101.82	91.3126	102.331	98.0669
Erlotinib	100.002	86.0875	112.898	212.027	175.533	199.254	161.178	227.443	189.553
Gefitinib	99.0989	85.1125	117.215	321.213	256.103	264.41	252.892	336.337	370.026
