# Supplementary material for: Genome-wide CRISPR screening reveals genetic modifiers of mutant EGFR dependence in human NSCLC
Source: eLife. 2019 Nov 19;8:e50223. doi: 10.7554/eLife.50223 (PMC6927754; doi:10.7554/eLife.50223)
Supplement: Supplementary file 1. — A threshold of RSA ≤ −3 and Q1 z-score ≤ −1 generated a list of 122 genes whose loss sensitized HCC827 cells to erlotinib treatment. A threshold of RSA ≤ −3 and Q3 z-score ≥1 generated a list of 171 genes whose loss conferred resistance to erlotinib in HCC827 cells. [file elife-50223-supp1.xlsx]

## Sheet: Negatively selected hits
Zeng et al., Supplementary Table 1. Selected hits from the erlotinib resistance CRISPR screen
symbol	Q1	RSA Down
RIC8A	-3.1902	-12.5409
UGDH	-2.41405	-7.58711
USP22	-3.11926	-6.65847
EXT1	-2.04677	-6.5476
GNB2	-2.52149	-6.53588
MLLT4	-2.93143	-6.42386
FGFR1	-3.05012	-5.97143
NDST1	-1.73293	-5.94088
NCKAP1	-2.01731	-5.86215
PPCS	-2.59395	-5.66906
ELOVL1	-2.25383	-5.63514
PKN2	-2.19958	-5.58265
B3GALT6	-2.14899	-5.56504
ISOC2	-1.80935	-5.1936
MORC2	-1.54535	-5.16433
LPAR2	-2.07401	-5.13049
ADNP	-2.14346	-5.0552
GLCE	-2.55127	-4.94792
BLNK	-2.63525	-4.91599
EP300	-1.85901	-4.84391
TJP1	-2.59496	-4.82501
RB1CC1	-2.24522	-4.79045
MUC6	-2.06718	-4.65234
SPTLC1	-2.5437	-4.59232
HS2ST1	-2.52294	-4.49053
WNT7B	-1.56708	-4.37999
TM9SF3	-2.48157	-4.33026
YAP1	-1.4929	-4.25637
TAF5L	-2.40886	-4.14358
TADA2B	-2.40632	-4.14001
GTF2H5	-2.13796	-4.13596
C20orf24	-2.4047	-4.13293
PARD6B	-1.78954	-4.087
TEAD1	-1.82047	-4.06132
ARHGEF18	-1.55734	-4.00074
FAM160A2	-1.18657	-3.98545
KLHDC9	-1.64085	-3.96867
RASSF2	-1.1189	-3.96399
PIK3CB	-2.34465	-3.96076
CTSH	-1.89201	-3.94252
GSS	-1.53819	-3.93629
NR0B2	-1.05194	-3.93579
TGIF2-C20orf24	-1.43117	-3.93476
PDS5B	-2.33267	-3.91571
MUC12	-1.13506	-3.90549
WASF2	-1.99352	-3.86002
STRAP	-1.55875	-3.85888
KDSR	-1.71087	-3.80131
AMACR	-1.92203	-3.79757
GCLC	-1.94502	-3.73417
SACM1L	-1.9083	-3.72372
SCGB2A1	-1.81789	-3.66045
ENHO	-1.17988	-3.64624
FANK1	-1.59871	-3.64439
FER	-2.21555	-3.59808
KSR1	-1.31843	-3.56843
DNAL4	-1.52258	-3.56803
MOSPD3	-1.33218	-3.54525
CRKL	-1.65903	-3.54466
INADL	-2.1953	-3.53588
ZNF319	-1.3017	-3.5251
UBE3B	-1.44657	-3.5237
DHRSX	-2.16567	-3.47827
CECR6	-1.34651	-3.45268
MAN2A2	-1.01215	-3.43752
IYD	-1.42343	-3.41082
DFFA	-1.56269	-3.40767
WDR7	-1.84098	-3.39857
VCL	-2.13015	-3.34943
AFAP1L2	-1.63536	-3.33769
RGS2	-2.12574	-3.33116
SLPI	-1.63081	-3.33068
CLSPN	-1.35716	-3.32894
COPE	-1.63062	-3.32802
EIF6	-2.12322	-3.32424
SAR1A	-2.11926	-3.31874
TM9SF2	-1.57609	-3.30221
SP5	-1.49893	-3.30025
FAM134A	-2.11134	-3.29177
RHOA	-2.10617	-3.27338
LRRC10B	-2.10609	-3.27208
Leap2	-2.89721	-3.26515
BCAS4	-1.31762	-3.2598
CYP4V2	-1.49197	-3.25926
GNA13	-1.0583	-3.25646
GLYR1	-1.53874	-3.25238
CPS1	-1.25886	-3.25173
FRS2	-1.66836	-3.21507
IGFBP7	-1.84695	-3.2097
HAS1	-1.27109	-3.20848
ICAM5	-1.5192	-3.18697
ITGAV	-1.67015	-3.18677
AP3D1	-1.12017	-3.18082
TEKT2	-2.06965	-3.16262
SEC61B	-1.87737	-3.15248
PCDH11Y	-1.62877	-3.14674
FAM208A	-1.85767	-3.14385
ASXL1	-1.82472	-3.14272
PGM1	-1.15296	-3.14254
AHSP	-1.45107	-3.14099
ICE1	-1.31383	-3.1239
TMEM140	-1.31819	-3.10694
CAMK2N1	-1.53577	-3.09811
DNAJC5	-2.04651	-3.0978
DKK1	-1.55132	-3.09665
RPS6KA1	-1.76341	-3.09431
SCRIB	-1.31111	-3.08141
ARPC3	-2.04012	-3.08103
SPAG6	-1.9597	-3.0746
SIAE	-1.62981	-3.0716
C6orf47	-2.00575	-3.06707
TCFL5	-1.06106	-3.06247
PM20D2	-1.65431	-3.05246
DEAF1	-1.33052	-3.05072
NFATC2	-1.08975	-3.04548
TMEM203	-1.39895	-3.04528
NNAT	-1.37165	-3.04267
BCAR1	-1.45994	-3.03465
GZF1	-1.52455	-3.01903
MAS1	-1.4585	-3.0096
ARF1	-1.13855	-3.00862
MUT	-1.92246	-3.00487

## Sheet: Positively selected hits
Zeng et al., Supplementary Table 1. Selected hits from the erlotinib resistance CRISPR screen
symbol	Q3	RSA Up
CUL5	5.29396	-14.7127
KCTD5	4.35368	-10.7765
PTEN	4.91564	-10.6691
PDCD10	3.43709	-9.01522
BTAF1	3.63433	-8.63337
FAM49B	3.87861	-7.4503
KEAP1	4.75876	-7.16826
NF1	2.9227	-7.02552
CSK	2.97553	-6.73471
PPM1A	2.27426	-6.40465
DDA1	2.9233	-6.25505
TSC1	2.55233	-6.18498
ZBTB43	3.4096	-6.13197
ARIH2	5.74201	-5.91446
TSC2	3.81506	-5.86193
CPD	3.41064	-5.76634
SERBP1	2.35011	-5.46183
SPRY2	3.53858	-5.42769
UBE2F	3.87965	-5.34989
NF2	3.97968	-5.15444
CLK3	1.86794	-5.02313
ETS1	2.64075	-4.92167
RNF7	4.72882	-4.80177
PCBP2	3.10108	-4.69112
ACIN1	2.99121	-4.68628
POTEG	2.43842	-4.64277
BAP1	3.11265	-4.59995
TAX1BP3	1.74693	-4.56595
C7orf55-LUC7L2	3.58921	-4.50215
ARMCX6	2.91667	-4.45077
USP13	3.17972	-4.40898
PPM1B	2.00647	-4.40752
FOXA1	2.46119	-4.31235
PCDHA7	1.49913	-4.30692
SLC35A1	1.62389	-4.25637
CTNND1	3.14462	-4.25183
NKX2-1	2.22895	-4.20601
LZTR1	2.67093	-4.19655
FBXW7	2.09483	-4.19262
ATP2C1	2.55671	-4.18184
SMG7	2.488	-4.17132
MED16	2.98247	-4.14211
HSPA14	2.32114	-4.09972
ABLIM3	2.44007	-4.09705
LCMT1	2.08426	-4.08936
CIC	2.35527	-4.068
MYL12B	2.21316	-4.06708
SLC4A2	2.46745	-3.96982
ROCK2	1.67857	-3.95817
FBXW11	2.57244	-3.95475
MED24	3.84245	-3.93814
GMPR2	1.68528	-3.90578
TOR1A	3.92859	-3.88604
TXNDC17	2.37799	-3.88038
TIPARP	2.2667	-3.87309
TIA1	1.47865	-3.8596
HECW2	2.31087	-3.83055
PEX6	2.70304	-3.82984
SPANXA1	2.14379	-3.81215
SPANXA2	2.14379	-3.81215
TPPP2	2.23615	-3.80367
PCBD1	2.07348	-3.77927
PRR32	2.54705	-3.76391
HIST1H2AI	2.34188	-3.75875
HIST1H2AJ	2.34188	-3.75875
CHD8	2.29618	-3.75872
PC	3.82305	-3.75135
DDHD1	3.71937	-3.65494
SPON2	3.70775	-3.64486
ATP5SL	1.86901	-3.64482
SMARCA4	2.8957	-3.63504
KRTAP10-2	3.68861	-3.61726
EIF4E2	1.77263	-3.60456
BLNK	3.66664	-3.59618
TRAF3	1.75462	-3.59171
NEUROD4	1.61036	-3.5754
TRPS1	3.64879	-3.57376
TXNRD1	1.97477	-3.54663
MBNL1	2.74058	-3.5445
TNNT3	2.38238	-3.53447
ARID4B	2.43471	-3.52092
RIN1	1.81318	-3.49895
FHL2	1.80492	-3.49776
BCL2L2-PABPN1	1.16852	-3.49307
TMEM204	1.09659	-3.47827
PSIP1	1.19964	-3.47773
ATP5I	1.67654	-3.46535
DLK1	2.30971	-3.46393
PIP4K2B	1.84726	-3.46203
SLC7A7	2.42891	-3.44785
CBR1	2.32824	-3.4358
SLC13A4	3.51414	-3.41584
ME2	3.06611	-3.41539
ZBED6	3.51307	-3.41278
SMLR1	2.29787	-3.40747
AMBRA1	2.22487	-3.4046
SAV1	1.79264	-3.39963
HDAC8	2.39767	-3.38724
ACRBP	3.47808	-3.37831
DSTN	2.67203	-3.36995
NIPAL4	2.93727	-3.36796
NRK	1.47753	-3.35405
REXO4	3.45945	-3.35085
TMEM159	2.37462	-3.34861
CAGE1	1.90586	-3.34349
NME4	2.88728	-3.33459
RHPN1	2.40515	-3.32879
RAB35	1.40717	-3.31494
SLC6A1	1.57737	-3.30996
CEBPZ	1.03922	-3.25646
FAM84B	2.20745	-3.23359
AWAT2	3.36202	-3.23154
EPHA4	2.81195	-3.22988
CBX3	1.59609	-3.21186
FGF13	3.34423	-3.20955
PDK3	3.34375	-3.20714
FSTL1	2.39586	-3.20656
RNF19B	2.29831	-3.19957
TRAF2	2.01689	-3.19892
SPRED2	1.55374	-3.19858
DCTN4	3.33018	-3.19047
CALM2	1.8426	-3.18446
CCDC136	2.31808	-3.18128
PPP2R5C	2.03843	-3.16854
ERI1	1.91262	-3.16763
PIGH	2.97305	-3.16595
SDR39U1	1.5421	-3.15875
CD300LF	2.30782	-3.15684
CSMD3	1.11898	-3.14344
ABHD8	2.46738	-3.1286
DNAJB6	3.28032	-3.12358
IL25	1.91977	-3.12059
PARP2	2.09395	-3.11831
KRTAP19-4	1.28724	-3.11184
EDDM3A	3.27171	-3.11166
ZC3H14	1.3234	-3.1059
MYOCD	1.94544	-3.09958
DDIT4	1.58187	-3.09807
NUTM2D	2.15711	-3.09567
NUDCD3	1.83338	-3.09146
KCTD9	1.99024	-3.0861
FAR2	1.51999	-3.08517
UBE2N	1.78083	-3.08448
SHB	1.76338	-3.08258
SOCS5	1.98171	-3.08041
GPRIN3	3.24226	-3.07278
TRIM33	2.50666	-3.07064
MIPOL1	2.0349	-3.06968
LAMTOR2	1.35911	-3.06751
CTDSPL2	1.41631	-3.06099
XPO4	1.48334	-3.04645
ZNF800	1.70421	-3.04535
ZC2HC1A	2.84029	-3.04139
ZZZ3	2.21135	-3.04047
C7orf33	3.2062	-3.03558
CTNNA1	2.25712	-3.03558
FURIN	3.20608	-3.0346
RBM23	2.38684	-3.03324
DPP9	1.42554	-3.03167
SENP8	3.19754	-3.02289
RGAG4	3.1963	-3.02192
CD248	1.78162	-3.01903
SLC35A5	2.10876	-3.01797
POLE3	1.80552	-3.01604
CCNYL1	1.76584	-3.01459
FCGR2A	1.322	-3.01276
MDP1	1.74322	-3.01025
PACS2	1.61379	-3.0066
STARD3	3.18224	-3.00468
PPP1R13B	1.4073	-3.00247
KRT8	1.37641	-3.00126
