# Supplementary material for: Genome-wide CRISPR screening reveals genetic modifiers of mutant EGFR dependence in human NSCLC
Source: eLife. 2019 Nov 19;8:e50223. doi: 10.7554/eLife.50223 (PMC6927754; doi:10.7554/eLife.50223)
Supplement: Supplementary file 2. — Individual sgRNA target sequences and their respective log2 fold change based on the comparison of sgRNA abundance in the erlotinib-treated versus DMSO-treated cell population were listed in this table. [file elife-50223-supp2.xlsx]

## Sheet: Negatively selected hits
barcode (sgRNA sequence)	comparison_name	log2 FC	symbol
TTGGCAGTTTAAGAAAAGCC	(Erlotinib-DMSO)	-4.93879	ADNP
CATGGGAGGATGTAGGACTG	(Erlotinib-DMSO)	-3.6176	ADNP
GATTGGGCACACAAATGTAG	(Erlotinib-DMSO)	-3.13909	ADNP
CAAGATTGTTGACAGGAAGT	(Erlotinib-DMSO)	-2.9359	ADNP
GGAGTCAAATCTGTAGGCCA	(Erlotinib-DMSO)	-0.666653	ADNP
GAGGTCCCAGAAACCAAAGA	(Erlotinib-DMSO)	-3.28991	AFAP1L2
GCAAGTCGGCCCCTTACCAG	(Erlotinib-DMSO)	-2.97465	AFAP1L2
GGATGCGGAAGGAGTAGAGG	(Erlotinib-DMSO)	-2.93877	AFAP1L2
GAACCTGAGCAGCACAGCAC	(Erlotinib-DMSO)	-0.879634	AFAP1L2
GCAAGGACCAGGCTGAGCAG	(Erlotinib-DMSO)	-0.779069	AFAP1L2
AATAAGGATCTCATTTCCGC	(Erlotinib-DMSO)	-3.29056	AHSP
GCTGAACTCCTTCAATCCTG	(Erlotinib-DMSO)	-2.74143	AHSP
GGAGCCCCAAGAGCGAGACA	(Erlotinib-DMSO)	-2.18115	AHSP
ATGTCTTCTTCAGAGACGAG	(Erlotinib-DMSO)	-1.93935	AHSP
TTACAGGCAGCAGGTGACAG	(Erlotinib-DMSO)	-1.77829	AHSP
GCACTAGCGAGCGCTTGCCC	(Erlotinib-DMSO)	-3.58986	AMACR
GCACAGACGCCGCAGCACGG	(Erlotinib-DMSO)	-3.3374	AMACR
GCTGGACCTGAAGCAGCCGC	(Erlotinib-DMSO)	-3.10046	AMACR
GACGTGAGCCGCTTGGGCCG	(Erlotinib-DMSO)	-1.54963	AMACR
CGAGATGCCCTGCAGTGCCA	(Erlotinib-DMSO)	-0.331612	AMACR
GCAGGACAACATAGCGGTGA	(Erlotinib-DMSO)	-2.34037	AP3D1
GGACTGCACGGACTTGGGGT	(Erlotinib-DMSO)	-2.3227	AP3D1
GCTTCCCAGAGCTTTCACGA	(Erlotinib-DMSO)	-2.22126	AP3D1
GGTGTCCAAGAAGAACCTGA	(Erlotinib-DMSO)	-1.87923	AP3D1
GCTGTGGTTGGGCATGCCGG	(Erlotinib-DMSO)	-1.79479	AP3D1
ATCTTCGCCAACCTCTTCAA	(Erlotinib-DMSO)	-2.98657	ARF1
CACCCAGCTTAAGCTTGTAG	(Erlotinib-DMSO)	-2.34597	ARF1
AGAACATCAGCTTCACTGTG	(Erlotinib-DMSO)	-2.19274	ARF1
AGGCTTCAACGTGGAAACCG	(Erlotinib-DMSO)	-2.03876	ARF1
TTCACTGTGTGGGACGTGGG	(Erlotinib-DMSO)	-1.722	ARF1
GCAACTTCTCCATCGTGCGG	(Erlotinib-DMSO)	-4.10615	ARHGEF18
GAACGGGCTCACCTTCCGCA	(Erlotinib-DMSO)	-2.87592	ARHGEF18
CAAGAAGCAAAAGAGGGAGG	(Erlotinib-DMSO)	-2.78429	ARHGEF18
TCAGCGGCAGCTCCACCTGG	(Erlotinib-DMSO)	-2.5785	ARHGEF18
GTACTCCAGGGCCCTGCAGG	(Erlotinib-DMSO)	-2.09534	ARHGEF18
CAGTGCAATTCCAAAAGCCA	(Erlotinib-DMSO)	-3.69814	ARPC3
AAACCAGGCTCTCCAGGAAT	(Erlotinib-DMSO)	-3.48684	ARPC3
GATCCTGATACCAAACTCAT	(Erlotinib-DMSO)	-2.6033	ARPC3
GTTTAGACTTACTCTCTCTG	(Erlotinib-DMSO)	-0.43796	ARPC3
CAGGATCCATGAGAGAAGAG	(Erlotinib-DMSO)	-0.202913	ARPC3
GGACAAACAGAAGAAGAAGA	(Erlotinib-DMSO)	-3.34215	ASXL1
GTTTTCACCACTCACAGTGC	(Erlotinib-DMSO)	-3.21427	ASXL1
GAAGCTCTGTAGCTGTCCCT	(Erlotinib-DMSO)	-2.66539	ASXL1
GAAGGAGCGCACGTGGGCCG	(Erlotinib-DMSO)	-2.33412	ASXL1
GAGAGTTGATCAGGGCACGG	(Erlotinib-DMSO)	1.36559	ASXL1
CAGCACTGCCAGGAAGGCGG	(Erlotinib-DMSO)	-4.1361	B3GALT6
GCAGCGTGATCCGCAGCACG	(Erlotinib-DMSO)	-3.62461	B3GALT6
CGTGTGGGCGCGCTTTGCCG	(Erlotinib-DMSO)	-3.59516	B3GALT6
GGCCTGGCTGGACGAGCACG	(Erlotinib-DMSO)	-3.07179	B3GALT6
GCGCCATGAAGCTGCTGCGG	(Erlotinib-DMSO)	-1.1967	B3GALT6
ACAGCAACTTCCAGCTCCAG	(Erlotinib-DMSO)	-2.90203	BCAR1
GTGGTGGTGCCCACCCGCGT	(Erlotinib-DMSO)	-2.75266	BCAR1
ACGTCATACACCTCCAGCAA	(Erlotinib-DMSO)	-2.35784	BCAR1
ATAGCCCTGCCCCACGCGGG	(Erlotinib-DMSO)	-2.29499	BCAR1
GTCGTAGAGGTCAGGAGCCG	(Erlotinib-DMSO)	-1.30353	BCAR1
GCAGCATCAGGAGGGCGACG	(Erlotinib-DMSO)	-2.57491	BCAS4
GAGGTGGAGGAGACCATCGA	(Erlotinib-DMSO)	-2.57256	BCAS4
CCTGAGGAGCATGCCCTCGA	(Erlotinib-DMSO)	-2.45173	BCAS4
TTTTCAGGCGAAGGAGGTGG	(Erlotinib-DMSO)	-2.38014	BCAS4
CAGCCGGAGCCCATGCGCAG	(Erlotinib-DMSO)	-0.0812062	BCAS4
GAAGTGTCTTGCTGAAGGGT	(Erlotinib-DMSO)	-4.49654	BLNK
AAGACAATCGATCAAGCCAG	(Erlotinib-DMSO)	-4.23993	BLNK
ACTTTACCTCATCCTCAAGG	(Erlotinib-DMSO)	-0.375623	BLNK
AGAGAGCCCTGCTGACGAAG	(Erlotinib-DMSO)	3.73469	BLNK
GATGTACGTGATGCCCGCCG	(Erlotinib-DMSO)	4.73434	BLNK
TCAGCCGCAGCTGGCCAACG	(Erlotinib-DMSO)	-4.43107	C20orf24
CGCGACGGGAGGATGAGCGG	(Erlotinib-DMSO)	-3.9482	C20orf24
TAAGGTGCTGCGGAGCGACG	(Erlotinib-DMSO)	-1.97278	C20orf24
GGAGACTTTGAGGGCCCCGT	(Erlotinib-DMSO)	-1.94976	C20orf24
CCGTCTGGAGTAAGGTGCTG	(Erlotinib-DMSO)	-0.545062	C20orf24
CAGGCCTCATTGGTTTCCGG	(Erlotinib-DMSO)	-4.00705	C6orf47
GCAGCTAGGGAGCAAAAGAA	(Erlotinib-DMSO)	-3.44334	C6orf47
GGATAGTGCCCCAGAAACCA	(Erlotinib-DMSO)	-2.84659	C6orf47
GCACAGGGCCAGCAGGGCAG	(Erlotinib-DMSO)	-0.709096	C6orf47
TTACCCAGAACCCAGACGGG	(Erlotinib-DMSO)	-0.443763	C6orf47
CCCGGACGCGACCATGTCGG	(Erlotinib-DMSO)	-3.75046	CAMK2N1
GCAGGCGGCAGGAGAAGATC	(Erlotinib-DMSO)	-2.84861	CAMK2N1
GTAGGGCAGCACCTCCGACA	(Erlotinib-DMSO)	-2.50039	CAMK2N1
AAGCTGAGCCCCTACGGCGA	(Erlotinib-DMSO)	-2.31851	CAMK2N1
GCTCAGCTTCTCGTCGCCGT	(Erlotinib-DMSO)	1.4189	CAMK2N1
GCAGGTCCAAGCACGTGCCC	(Erlotinib-DMSO)	-3.09058	CECR6
CAGGGGTCCTGCCGATCCCG	(Erlotinib-DMSO)	-2.60913	CECR6
GGTGCGGGCCATCAGCGAGG	(Erlotinib-DMSO)	-2.48903	CECR6
GTAGAGCCAGAGCACCGGCG	(Erlotinib-DMSO)	-2.4478	CECR6
CCTGCTCGACAGCTTCACGC	(Erlotinib-DMSO)	-0.694026	CECR6
AGATGGGTTTGAGGAAGAGG	(Erlotinib-DMSO)	-2.66943	CLSPN
AGACAGTGATTCCGAAACAG	(Erlotinib-DMSO)	-2.62259	CLSPN
AGAAGTCATGACAGGCGAGG	(Erlotinib-DMSO)	-2.28624	CLSPN
GGAAGAACTAGAGGAAGAGG	(Erlotinib-DMSO)	-1.87557	CLSPN
GAACAGCCATTTAATGACAG	(Erlotinib-DMSO)	-1.85459	CLSPN
ATCAAGCCCAGAGAGAGACG	(Erlotinib-DMSO)	-3.64179	COPE
CTACCAGCAGTGCATAAACG	(Erlotinib-DMSO)	-2.96865	COPE
CTGGAGCTCAGGGGCCGAGG	(Erlotinib-DMSO)	-2.93533	COPE
GTAGTCAGCAAACATGCGCA	(Erlotinib-DMSO)	-0.387079	COPE
GTATAGAGCGTACCTGGCGC	(Erlotinib-DMSO)	0.183759	COPE
GTTCCGCCTATGCACTGGGT	(Erlotinib-DMSO)	-2.86037	CPS1
GGAGTGGAACTATTCAAGAG	(Erlotinib-DMSO)	-2.4982	CPS1
GAAAACGGTCAAGATCCCAG	(Erlotinib-DMSO)	-2.46922	CPS1
ATGACCTCTGTGACAAACTG	(Erlotinib-DMSO)	-2.37717	CPS1
GATTGCTCCAAGTTTTGCAG	(Erlotinib-DMSO)	2.17118	CPS1
CGAGGAACATACCGTGGCGC	(Erlotinib-DMSO)	-3.60729	CRKL
CGAGGAGTCGAACCTGGCGG	(Erlotinib-DMSO)	-3.00459	CRKL
GGTCCCCGATCTTAAAACGG	(Erlotinib-DMSO)	-2.96408	CRKL
GCAGCGAGTTGATGATGTAG	(Erlotinib-DMSO)	-2.07392	CRKL
GCCCCATATACCAGGCGGAG	(Erlotinib-DMSO)	-1.93645	CRKL
GGTAGGGACCAGTACCTCGA	(Erlotinib-DMSO)	-4.16392	CTSH
AAGATAAACGCCCACAACAA	(Erlotinib-DMSO)	-3.29942	CTSH
GGAGTTCACGCACAGTTCGG	(Erlotinib-DMSO)	-3.14668	CTSH
CAAACGTCTGCAGCCTGTGG	(Erlotinib-DMSO)	-2.12673	CTSH
CCGTAAGACCTACAGTACGG	(Erlotinib-DMSO)	-0.0360667	CTSH
GCAGCGCGTGGCCCACCAGT	(Erlotinib-DMSO)	-3.36049	CYP4V2
GAAGCTGCTGCTGTGGGGCG	(Erlotinib-DMSO)	-2.79319	CYP4V2
GATGCGGCCCATCCCCACGG	(Erlotinib-DMSO)	-2.69237	CYP4V2
GCTCAGGACCAGACTGGCGC	(Erlotinib-DMSO)	-2.37998	CYP4V2
GCAGATCATTGAGTACACAG	(Erlotinib-DMSO)	-1.01979	CYP4V2
GAGCAGGGACGAGGACTCGG	(Erlotinib-DMSO)	-2.60892	DEAF1
GGAGCCCGGGCACATGGACA	(Erlotinib-DMSO)	-2.58889	DEAF1
GGCAGTGGCGGTGATGGCGG	(Erlotinib-DMSO)	-2.42424	DEAF1
GGAGGAGGACGCAGACTCGG	(Erlotinib-DMSO)	-2.30031	DEAF1
GCAGCTGGGCCTGGCTGAGG	(Erlotinib-DMSO)	-0.0120065	DEAF1
GTGGAGGATGGAGGTGACCG	(Erlotinib-DMSO)	-3.46865	DFFA
ACAGCGGGGCAGGGTTGAAG	(Erlotinib-DMSO)	-2.88268	DFFA
GATGTAGATGAAACAGACAG	(Erlotinib-DMSO)	-2.71964	DFFA
CAGCCGCGAACAGCACGGCG	(Erlotinib-DMSO)	-2.43156	DFFA
CAGGTCTTCGAGGCAGGAGG	(Erlotinib-DMSO)	2.77368	DFFA
CAGCTGCGCCAGGATCACCG	(Erlotinib-DMSO)	-5.29838	DHRSX
ACGGGAGGGACAGATGGCAT	(Erlotinib-DMSO)	-3.64572	DHRSX
GGTCTACGCGGTAGGCGCCG	(Erlotinib-DMSO)	-2.74742	DHRSX
GCCATTGTCTGCGGCGCGGG	(Erlotinib-DMSO)	-1.20602	DHRSX
GTGTCGCTATAGTGACGGGA	(Erlotinib-DMSO)	-1.04434	DHRSX
TACCCGGGTCTTTGTCGCGA	(Erlotinib-DMSO)	-3.06411	DKK1
ATTGAGAACCGAGTTCAAGG	(Erlotinib-DMSO)	-2.86829	DKK1
GATGATGGCTCTGGGCGCAG	(Erlotinib-DMSO)	-2.67836	DKK1
ATGGTAGCGGCGGCTCTCGG	(Erlotinib-DMSO)	-2.31796	DKK1
GTGGCGCTCACTCCCAGCAG	(Erlotinib-DMSO)	-0.72596	DKK1
GTGGTACAATGACTCCCCAG	(Erlotinib-DMSO)	-3.8578	DNAJC5
ATTGTACCACGTCCTTGGGT	(Erlotinib-DMSO)	-3.49492	DNAJC5
GATCTCCTTAAACTTGTCCG	(Erlotinib-DMSO)	-2.44177	DNAJC5
CAAGAACCCCGACAACCCGG	(Erlotinib-DMSO)	-2.07289	DNAJC5
GCTGTCCAGCTGGTGGGCCA	(Erlotinib-DMSO)	-0.984252	DNAJC5
AGGATCATGGGAGAAACAGA	(Erlotinib-DMSO)	-3.93915	DNAL4
GCTTACCCTGACCAGAGGGA	(Erlotinib-DMSO)	-2.83193	DNAL4
AACAGAAGGGAAGAAAGATG	(Erlotinib-DMSO)	-2.67184	DNAL4
GCGACTGCAGACCTTCCCTC	(Erlotinib-DMSO)	-2.48779	DNAL4
CTAGCACTCGGACATGCCAG	(Erlotinib-DMSO)	-1.13536	DNAL4
GAGGCTCAGAGAACTTCTAC	(Erlotinib-DMSO)	-3.74955	EIF6
TCTGGCAGATGTGCTCAAGG	(Erlotinib-DMSO)	-3.59199	EIF6
AGACGCGTGCACCACGGGGA	(Erlotinib-DMSO)	-1.68288	EIF6
GGAAGTCTTCAGACAGACAG	(Erlotinib-DMSO)	0	EIF6
GCTCTCCGATACCATCCCCG	(Erlotinib-DMSO)	0.542365	EIF6
TGAGAGAACGAAGTACACGT	(Erlotinib-DMSO)	-5.38347	ELOVL1
CAAGAGGTGATGAAGCACGC	(Erlotinib-DMSO)	-3.75728	ELOVL1
GAATGGAGGTCATTAGCAAG	(Erlotinib-DMSO)	-3.10297	ELOVL1
CACGTAGGTCAGGAGAATGG	(Erlotinib-DMSO)	-3.08761	ELOVL1
AGAGGGTAGCCCTGGATCCG	(Erlotinib-DMSO)	-2.02618	ELOVL1
TTCAGAGAGAGAGTCAACGT	(Erlotinib-DMSO)	-2.53702	ENHO
GTCGGCAGAGCGAGAATGGC	(Erlotinib-DMSO)	-2.39827	ENHO
GTTGCAGACGATGGCGATGA	(Erlotinib-DMSO)	-2.35543	ENHO
GAGAATGGCAGGCCCAGCAG	(Erlotinib-DMSO)	-2.20289	ENHO
GCTTCTTGCTGCTGCTGCTC	(Erlotinib-DMSO)	-1.97229	ENHO
GACTTCTCCCAACATGGGGA	(Erlotinib-DMSO)	-3.45812	EP300
GGACAGCAGATTGGAGCCAG	(Erlotinib-DMSO)	-3.25765	EP300
TCAGATGCCGACACAACCCC	(Erlotinib-DMSO)	-2.97422	EP300
ACAGAATTGGGACTAACCAA	(Erlotinib-DMSO)	-2.88374	EP300
AGATTTTCTCAGCTAGAAGG	(Erlotinib-DMSO)	-1.68796	EP300
GTACTTCCTGAGAGGAGGGA	(Erlotinib-DMSO)	-4.02395	EXT1
GGATCATCCCAGGACAGGAG	(Erlotinib-DMSO)	-3.49526	EXT1
GTAGAACCTGGAGCCCTCGA	(Erlotinib-DMSO)	-3.42885	EXT1
CACTTGGCCTGACTACACCG	(Erlotinib-DMSO)	-3.30004	EXT1
GGATGATCCTTAGAAAAGAG	(Erlotinib-DMSO)	-2.06043	EXT1
AGGGGACCAGGAATACATGA	(Erlotinib-DMSO)	-3.41953	EZH1
GCGTTTATATACATTAGGGG	(Erlotinib-DMSO)	-2.85678	EZH1
GAATCAGTACTCAGATGAGG	(Erlotinib-DMSO)	-2.62711	EZH1
CCAATGCCAAGTCTGTGCAG	(Erlotinib-DMSO)	-2.27979	EZH1
AGTCGTATTTAAAGCAGCGC	(Erlotinib-DMSO)	-1.24405	EZH1
GAGCCGCAGCCACAGCGTCG	(Erlotinib-DMSO)	-3.64127	FAM134A
GCTGCACAGCCTGGTCACGG	(Erlotinib-DMSO)	-3.57696	FAM134A
GACGCCTGGCCACGACGCTG	(Erlotinib-DMSO)	-2.40402	FAM134A
GCTATGGCGAGCGGCGGTGG	(Erlotinib-DMSO)	-1.12484	FAM134A
GAAGAAGGGCCGGAGGGACG	(Erlotinib-DMSO)	-0.028156	FAM134A
GCCCAGCCTGCCTCATGGAG	(Erlotinib-DMSO)	-2.4228	FAM160A2
GATGTTGACACTGCTGGCAG	(Erlotinib-DMSO)	-2.40673	FAM160A2
GTGCAGAGCAAACTCCAGCA	(Erlotinib-DMSO)	-2.23702	FAM160A2
GCAGCTGCCATGTCAACACA	(Erlotinib-DMSO)	-2.11637	FAM160A2
GGGATGGGGTCGAGGAACGG	(Erlotinib-DMSO)	-2.09002	FAM160A2
GACATGATGCTGACTTGAGG	(Erlotinib-DMSO)	-3.85348	FAM208A
TTAAAGCATCAGCCAAGGGT	(Erlotinib-DMSO)	-3.25596	FAM208A
CCAATGCAGCACCACAGGAG	(Erlotinib-DMSO)	-2.41955	FAM208A
CGTGTTGACAGGTCAGGTGG	(Erlotinib-DMSO)	-1.95703	FAM208A
AGAGACCACCTACCATATGG	(Erlotinib-DMSO)	-1.77946	FAM208A
GAAAAGAAAGCCAAACGCCA	(Erlotinib-DMSO)	-2.93707	FANK1
GTTGTAGACACTGAGACGAG	(Erlotinib-DMSO)	-2.92826	FANK1
GCCAAGGACCTCAAGAGCAG	(Erlotinib-DMSO)	-2.58524	FANK1
GCTGTACTCACACTCCCCAG	(Erlotinib-DMSO)	-2.51545	FANK1
GCTGTACAGATTTCGCCTGA	(Erlotinib-DMSO)	0.101509	FANK1
GAAGGAAACTGAAAAGGCCA	(Erlotinib-DMSO)	-3.71876	FER
GATAACCAGTCTTGTCACAG	(Erlotinib-DMSO)	-3.70883	FER
GATAGAGGCAGAGATGATCA	(Erlotinib-DMSO)	-2.83524	FER
TGTAAGGAGTCCAGAAGCAG	(Erlotinib-DMSO)	-0.34243	FER
GCAGATGCTTTTAAACAAGG	(Erlotinib-DMSO)	0	FER
CCAGTGGCTAAAGCACATCG	(Erlotinib-DMSO)	-5.08993	FGFR1
TAATACCACCGACAAAGAGA	(Erlotinib-DMSO)	-4.76492	FGFR1
GTTGCCCGCCAACAAAACAG	(Erlotinib-DMSO)	-2.87072	FGFR1
GGATGTCCAATATGGAGCTA	(Erlotinib-DMSO)	-2.303	FGFR1
ATGATGATCTCCAGGTACAG	(Erlotinib-DMSO)	-2.10854	FGFR1
CGAAGGTGTCAAACTGGACA	(Erlotinib-DMSO)	-5.09966	FRS2
ACACTGTCCCAGATAACCAT	(Erlotinib-DMSO)	-3.0164	FRS2
GATGGGAATGAGTTAGGTTC	(Erlotinib-DMSO)	-2.17824	FRS2
TGACCTTAAACTTGTTCCGA	(Erlotinib-DMSO)	-2.13554	FRS2
ACAGCTACAACAGCTACCCA	(Erlotinib-DMSO)	-1.78409	FRS2
CGAGGTCAAACCCAACCCAG	(Erlotinib-DMSO)	-3.52907	GCLC
GCCATGCCGACCACGTGCGG	(Erlotinib-DMSO)	-3.3665	GCLC
ACACCAGGACAGCCCTACGG	(Erlotinib-DMSO)	-3.0194	GCLC
TACTCTGGTCTCCAAAGGGT	(Erlotinib-DMSO)	-2.54713	GCLC
GGTAGATGTGCAGGAACTGG	(Erlotinib-DMSO)	-1.64433	GCLC
ACAATTAAAGGGAGACGAGA	(Erlotinib-DMSO)	-5.66167	GLCE
ACAAAGCAATCCAGTTTCCA	(Erlotinib-DMSO)	-4.13366	GLCE
GGAAAGGTGGTTCAGTATGA	(Erlotinib-DMSO)	-3.44048	GLCE
GTAGTGGCTTCAGAGTGGAT	(Erlotinib-DMSO)	-2.50055	GLCE
AAGCCACTACTCGAACGCCG	(Erlotinib-DMSO)	-1.60727	GLCE
AAGGACTTGAAGAAACCTCG	(Erlotinib-DMSO)	-3.17294	GLYR1
GAATCGACGTAATTCCAGTG	(Erlotinib-DMSO)	-2.85237	GLYR1
AAGAAGCATTTCTTTCCGCG	(Erlotinib-DMSO)	-2.45902	GLYR1
CACGGTACTAGACTCCGGGA	(Erlotinib-DMSO)	-2.11581	GLYR1
ACTTAGCCTGTCTGAAGGGA	(Erlotinib-DMSO)	-1.82401	GLYR1
GATCCGCATCTGCTTCAGGA	(Erlotinib-DMSO)	-5.16146	GNA13
GGGGAAGCACACGGACAGCA	(Erlotinib-DMSO)	-2.24441	GNA13
ACGGACAGCACGGACCGCGA	(Erlotinib-DMSO)	-1.91893	GNA13
GGGAAAAGACCTATGTGAAG	(Erlotinib-DMSO)	-1.34816	GNA13
CACTCGTCAGCAGGCAGCCG	(Erlotinib-DMSO)	0.495746	GNA13
TCTTTGCCAGGTGCCCACGG	(Erlotinib-DMSO)	-5.26933	GNB2
CAAAGATCTATGCCATGCAC	(Erlotinib-DMSO)	-4.09598	GNB2
AAAGTTCCCTGAGGGCGCGT	(Erlotinib-DMSO)	-3.89674	GNB2
GAATCCAGATGAGGACCCGG	(Erlotinib-DMSO)	-1.86943	GNB2
GCTGGAGCAACTGAGACAGG	(Erlotinib-DMSO)	-1.24942	GNB2
GTGGATGTCAAAGAGACGAG	(Erlotinib-DMSO)	-3.72588	GSS
GATGGACTTCAACCTGCTAG	(Erlotinib-DMSO)	-2.85168	GSS
GACCCACCGGTGCACAGCTG	(Erlotinib-DMSO)	-2.80408	GSS
GCTACTGATTGCTCAAGAGA	(Erlotinib-DMSO)	-2.61282	GSS
GCAGGATAAACAGCAGCTAG	(Erlotinib-DMSO)	-1.25362	GSS
AACATGGTCAACGTCTTGAA	(Erlotinib-DMSO)	-4.09071	GTF2H5
GAACTTCTTCCCCAGGGCAT	(Erlotinib-DMSO)	-3.61065	GTF2H5
TGGATGAGTCCAATGCCCTG	(Erlotinib-DMSO)	-2.66015	GTF2H5
AATGATGAACTTCTTCCCCA	(Erlotinib-DMSO)	-2.28518	GTF2H5
GTACAGCAGAAACTGCTTCA	(Erlotinib-DMSO)	-2.13973	GTF2H5
GAGCAGCAGAAAACTGCTGA	(Erlotinib-DMSO)	-3.13141	GZF1
GGTGCAGCGAATGCTGGAAG	(Erlotinib-DMSO)	-2.83442	GZF1
GGACCAAAGCCCGGACAGGG	(Erlotinib-DMSO)	-2.31988	GZF1
TGAGTTTGTCTACACTGCAA	(Erlotinib-DMSO)	-1.79654	GZF1
GTGTGACGTGACAGTCAGCG	(Erlotinib-DMSO)	-1.72686	GZF1
GATGAGCAGGGCGAAGGCGA	(Erlotinib-DMSO)	-3.23606	HAS1
GCAGCGGCAGGCTGCAGGAG	(Erlotinib-DMSO)	-2.51368	HAS1
CAGGAGGCCGTAGCGATCGG	(Erlotinib-DMSO)	-2.32718	HAS1
GCTGCGCGTCCTCATGGTGG	(Erlotinib-DMSO)	-1.97171	HAS1
GAAGGCCCCGTAGAGGCCGA	(Erlotinib-DMSO)	-1.80699	HAS1
GCCCAAGTTGCAGCTGCTGG	(Erlotinib-DMSO)	-4.12267	HS2ST1
AAACCAGATCCAGAAACTGG	(Erlotinib-DMSO)	-4.09782	HS2ST1
GAAGAGCATCGCCACCGCGA	(Erlotinib-DMSO)	-2.24061	HS2ST1
GAGCAGCGACATACAATGGA	(Erlotinib-DMSO)	-1.34116	HS2ST1
TGGGCGGCATCATAATCCTG	(Erlotinib-DMSO)	-0.314169	HS2ST1
GGAGCGCGCACAGTGCACTG	(Erlotinib-DMSO)	-2.86079	ICAM5
GTAGTGTGCGCCGCGCGCAG	(Erlotinib-DMSO)	-2.82765	ICAM5
GATCATTGGCCGCCTTGCAG	(Erlotinib-DMSO)	-1.87	ICAM5
GTTCACCGGCGAAGCTGCGG	(Erlotinib-DMSO)	-1.82921	ICAM5
GAGCCAACTTCCAAGAGCCG	(Erlotinib-DMSO)	-1.79754	ICAM5
GTACAAAGTCATCGTGACGG	(Erlotinib-DMSO)	-2.94399	ICE1
GTGAGGTGATGACATCGGAG	(Erlotinib-DMSO)	-2.56777	ICE1
ACACAACTCAGACTTCCCAG	(Erlotinib-DMSO)	-2.50954	ICE1
GAAGATGATGACTCAGGTGA	(Erlotinib-DMSO)	-2.32772	ICE1
GGCACTGGTGACAGAAGAGG	(Erlotinib-DMSO)	0	ICE1
TCGCCCAGCAGGCAGCCCAG	(Erlotinib-DMSO)	-4.09118	IGFBP7
GAAGAGCCGCAAGAGGCGGA	(Erlotinib-DMSO)	-3.2424	IGFBP7
AGGAGCAGGGCGCGCAGCGA	(Erlotinib-DMSO)	-2.8954	IGFBP7
GAGCAGGAGCAGCAGCCCAG	(Erlotinib-DMSO)	-0.299369	IGFBP7
GCCGCAGGTGTCCGAAGAGG	(Erlotinib-DMSO)	0.327988	IGFBP7
ATAGAACGGCCTTCAACTGG	(Erlotinib-DMSO)	-4.48276	INADL
GTGAGGACTATAGTTCCTGG	(Erlotinib-DMSO)	-3.68321	INADL
GATGGTGTAGCAGAAAGAAG	(Erlotinib-DMSO)	-0.805406	INADL
AAGTTGGCTGAACAATCTGA	(Erlotinib-DMSO)	-0.445043	INADL
GCAGTCCATCAAGCAACTGA	(Erlotinib-DMSO)	-0.102589	INADL
ACCCTGGACCTCCTAGACCG	(Erlotinib-DMSO)	-3.94898	ISOC2
GTCACACAGGAACAGGACAG	(Erlotinib-DMSO)	-3.19482	ISOC2
GGAAGTAGGCGATGTTGTGG	(Erlotinib-DMSO)	-2.8688	ISOC2
GCAGCCACTGAGACGATCTG	(Erlotinib-DMSO)	-2.78033	ISOC2
ACAGGACAGAGGATCCTGGG	(Erlotinib-DMSO)	-2.46	ISOC2
GAGCCACGATCCATGAAGAG	(Erlotinib-DMSO)	-3.63915	ITGAV
CAGATGCTCCAAACCACTGA	(Erlotinib-DMSO)	-3.01867	ITGAV
TGATGGCAAACTCCAAGAGG	(Erlotinib-DMSO)	-2.88749	ITGAV
AGGCAATAGAGATTATGCCA	(Erlotinib-DMSO)	-1.0614	ITGAV
GTGACTGGTCTTCTACCCGC	(Erlotinib-DMSO)	0	ITGAV
GCAGAGAATGGCTACCAAGA	(Erlotinib-DMSO)	-2.85111	IYD
GATAATGTCATCAGAACGGC	(Erlotinib-DMSO)	-2.70646	IYD
GATAGTGGTTATGAGAGAAG	(Erlotinib-DMSO)	-2.59741	IYD
GTGACAGGAACAGCCCCGAG	(Erlotinib-DMSO)	-2.4327	IYD
AAGTAATGAGCAAGTCCCAA	(Erlotinib-DMSO)	0.880781	IYD
CACCCGGCGCTCCTTCATGG	(Erlotinib-DMSO)	-4.72299	KDSR
TAGGTTACAGGAGGTTCCAG	(Erlotinib-DMSO)	-3.0702	KDSR
ACAGGAGAAACTGGGTCCAG	(Erlotinib-DMSO)	-2.20329	KDSR
GACATGCTGGTAAATTGTGC	(Erlotinib-DMSO)	-2.05349	KDSR
GCAGCAGCACGAAGGCCACG	(Erlotinib-DMSO)	-2.0257	KDSR
CCCGCGCAGTCACCACGACG	(Erlotinib-DMSO)	-3.81395	KLHDC9
AGAGCCCAGCAGCGATACGG	(Erlotinib-DMSO)	-2.98159	KLHDC9
GCCGTACGATTGGGAGCCCG	(Erlotinib-DMSO)	-2.93984	KLHDC9
GGTGGTTTTCGACCCAGCTA	(Erlotinib-DMSO)	-2.62267	KLHDC9
GTAGGTGGTCTCCTAGCAGG	(Erlotinib-DMSO)	-1.41382	KLHDC9
AGAGGCCCTCACTGAAGCTG	(Erlotinib-DMSO)	-2.79251	KSR1
GGAGTTCATTGGATGCGCGG	(Erlotinib-DMSO)	-2.57359	KSR1
AAGGAGCACTCACCTCATCG	(Erlotinib-DMSO)	-2.24249	KSR1
GATCCCCACAGATGGTACGG	(Erlotinib-DMSO)	-1.99283	KSR1
GCTGGAGATGAATGAGGCCA	(Erlotinib-DMSO)	-1.94532	KSR1
GAATGACCCCATTTTGGAGA	(Erlotinib-DMSO)	-4.57144	Leap2
GCCCGCGAAGAGGTCAGCCG	(Erlotinib-DMSO)	-3.8539	LPAR2
GTTGTTATAGAAGAAGCCGA	(Erlotinib-DMSO)	-3.52972	LPAR2
GAAGCGGCGGTTGGAGGCGA	(Erlotinib-DMSO)	-3.49067	LPAR2
AGATGGGCTGGTGGAAGCGG	(Erlotinib-DMSO)	-2.59423	LPAR2
GGTAGGCCACGCCCGCGAAG	(Erlotinib-DMSO)	-1.76656	LPAR2
GCTCAGCGCGCACACTGCGC	(Erlotinib-DMSO)	-3.57059	LRRC10B
GAAGCTGTATGTGAGCGGCA	(Erlotinib-DMSO)	-3.57032	LRRC10B
TGAGCTGCCGTCGGACGCAG	(Erlotinib-DMSO)	-1.51425	LRRC10B
GCAGAGGAGCAGCTGCGCAG	(Erlotinib-DMSO)	-0.401575	LRRC10B
GGGCATCGCCGAGTCCACGC	(Erlotinib-DMSO)	-0.281497	LRRC10B
GCTGTAGCTGCAGCACGCCC	(Erlotinib-DMSO)	-3.13143	MAN2A2
GATATGACAAGCCCCAGGAG	(Erlotinib-DMSO)	-2.186	MAN2A2
GTAGTCCCGGATGTCCACCA	(Erlotinib-DMSO)	-2.03117	MAN2A2
GAGTCCTGGAAGCCCACCTG	(Erlotinib-DMSO)	-1.98412	MAN2A2
GGAGCTGACAGCCAACGCAG	(Erlotinib-DMSO)	-1.89773	MAN2A2
GCACATGACATACTCCATGG	(Erlotinib-DMSO)	-3.52956	MAS1
TCCGGAAGCACAGGAACCAG	(Erlotinib-DMSO)	-2.75084	MAS1
ATTCTCAACAAACCCCACTG	(Erlotinib-DMSO)	-2.29291	MAS1
GTGGGTGATGTAGACAGTGA	(Erlotinib-DMSO)	-2.28425	MAS1
GATGTCTGCGATAGACAGGT	(Erlotinib-DMSO)	-1.48934	MAS1
GGAAGAGCTGAGAGAAGAGC	(Erlotinib-DMSO)	-4.69159	MLLT4
TATGAAGTGCATGTCAGCGG	(Erlotinib-DMSO)	-4.61473	MLLT4
AGGGCCCAAGACATAAACCT	(Erlotinib-DMSO)	-3.86452	MLLT4
CAAGATGGTGAGCATGATGG	(Erlotinib-DMSO)	-2.43274	MLLT4
AGGTGGTTATGAAACGACGG	(Erlotinib-DMSO)	-2.09644	MLLT4
GAAACGTGCGAGACAGGAAG	(Erlotinib-DMSO)	-2.90673	MORC2
GGGCTCAATGCGCATTGGGA	(Erlotinib-DMSO)	-2.86074	MORC2
GGGATCAATATAGAGCACAG	(Erlotinib-DMSO)	-2.50685	MORC2
GGATCAAGGAGGCCAAGCAG	(Erlotinib-DMSO)	-2.4961	MORC2
TGGATGAAGATCCTCATCCG	(Erlotinib-DMSO)	-2.45275	MORC2
ACAACGGGTCCCAAGGGAGG	(Erlotinib-DMSO)	-3.07294	MOSPD3
TAGAGGGTCAGCAGCTGTCG	(Erlotinib-DMSO)	-2.59099	MOSPD3
GAAGCGAAGCGCAGTTCCTG	(Erlotinib-DMSO)	-2.53032	MOSPD3
GCTGTCTGAGGAAGGAGCTG	(Erlotinib-DMSO)	-2.47973	MOSPD3
CCCAGAGCCTGCATGCGCCG	(Erlotinib-DMSO)	-0.100258	MOSPD3
GAATCAACAGTATCCCACAG	(Erlotinib-DMSO)	-2.34641	MUC12
GAATCTACTACCTTCCACAG	(Erlotinib-DMSO)	-2.34155	MUC12
GTGTTGTGTCTGTGGAGCCG	(Erlotinib-DMSO)	-2.33375	MUC12
ACTGAGGTTGCAGAGTGGGA	(Erlotinib-DMSO)	-2.28915	MUC12
GAGTCTCCAACAAGAACTGA	(Erlotinib-DMSO)	-2.06243	MUC12
CAGCTATTGTGACCTCCCCG	(Erlotinib-DMSO)	-3.87755	MUC6
GCCGCTCCGTGCACACCCAG	(Erlotinib-DMSO)	-3.52108	MUC6
GCAGCTGGACACTGAAGGTG	(Erlotinib-DMSO)	-3.36013	MUC6
GGAAGGTGCAGATCTCGCCG	(Erlotinib-DMSO)	-1.93236	MUC6
GAGCTGGAGCAGCTGTGCTG	(Erlotinib-DMSO)	-1.78749	MUC6
AAAACCAGCATACTGGCGGA	(Erlotinib-DMSO)	-3.6047	MUT
AAAGTGGCTGATCCTTGGGG	(Erlotinib-DMSO)	-3.33794	MUT
ATACCATATGCAGGAAGCAG	(Erlotinib-DMSO)	-2.82179	MUT
CCGTACTGCAATAGAAGCAA	(Erlotinib-DMSO)	-1.41737	MUT
GGAGTGAAGCCATTCACACG	(Erlotinib-DMSO)	-0.660617	MUT
ATAGGCATGTGGAGACCCCA	(Erlotinib-DMSO)	-4.39767	NCKAP1
GCACCTTCTTGATGTTGTAG	(Erlotinib-DMSO)	-3.45797	NCKAP1
GTCTCGAATTGAAGAAAGGA	(Erlotinib-DMSO)	-3.35731	NCKAP1
GCCCAGTCAGCAGAAGCTGG	(Erlotinib-DMSO)	-2.88245	NCKAP1
GGGTGAGCATGCCGACGCCC	(Erlotinib-DMSO)	-2.63818	NCKAP1
GCTGCCACTCAAGCCTGTGC	(Erlotinib-DMSO)	-3.24605	NDST1
ATACCGCACAGAGATTGCGC	(Erlotinib-DMSO)	-3.09811	NDST1
GTACTGTGTGGCCTACGGCG	(Erlotinib-DMSO)	-3.0768	NDST1
GAAGCGGCTGGACTCCAGGA	(Erlotinib-DMSO)	-2.6773	NDST1
CGTGCCGACACAGCCTCCGG	(Erlotinib-DMSO)	-2.65914	NDST1
GGCCCGCGTCTCTCATGCGG	(Erlotinib-DMSO)	-2.94641	NFATC2
GCGGCCACTCAAGTGGAGGG	(Erlotinib-DMSO)	-2.28421	NFATC2
GCGGAGGCATTCGTGCGCCG	(Erlotinib-DMSO)	-2.11815	NFATC2
GAGCGCGGCCAAGCCAGCAG	(Erlotinib-DMSO)	-1.83007	NFATC2
GGGCAGGGTGAACCTCGGGC	(Erlotinib-DMSO)	-1.73818	NFATC2
GACTTACCTGCAGCAGCACG	(Erlotinib-DMSO)	-2.76035	NNAT
GTATACCTCACTTCTCGCAA	(Erlotinib-DMSO)	-2.64094	NNAT
TGGAACCATGGCGGCAGTGG	(Erlotinib-DMSO)	-2.49359	NNAT
GATGATGAGCAGTTCAGCCG	(Erlotinib-DMSO)	-2.29757	NNAT
GCAATGGGCTGTGTCCCTGG	(Erlotinib-DMSO)	1.19261	NNAT
GGTGCTGCCTACATAGGCAG	(Erlotinib-DMSO)	-3.70136	NR0B2
GAAGTGCGTAGAGAATGGCG	(Erlotinib-DMSO)	-2.23637	NR0B2
CATGAGCACCAGCCAACCAG	(Erlotinib-DMSO)	-2.17023	NR0B2
CCAGGGGCCTGCCCATGCCA	(Erlotinib-DMSO)	-2.08572	NR0B2
ACCTCATCGCACCTGCCGGG	(Erlotinib-DMSO)	-2.07376	NR0B2
GAACCGCAGCCACCGGCACG	(Erlotinib-DMSO)	-3.56593	PARD6B
AGTTTGGAGCTGAATTTCGT	(Erlotinib-DMSO)	-3.16975	PARD6B
CACTATGGAGGTGAAGAGCA	(Erlotinib-DMSO)	-2.77409	PARD6B
CGGCTGCCTGGGCACTATGG	(Erlotinib-DMSO)	-2.66124	PARD6B
TCGCTGGAAAGATCAAAACC	(Erlotinib-DMSO)	-1.87872	PARD6B
GGAACACCACGCATACTAGC	(Erlotinib-DMSO)	-4.23923	PCDH11Y
CTCACGATCAATGCGAGCGC	(Erlotinib-DMSO)	-2.96631	PCDH11Y
CAAGATATGCTGCATTCTCC	(Erlotinib-DMSO)	-2.63468	PCDH11Y
CTATGAGGACTGAATGACAG	(Erlotinib-DMSO)	-2.33562	PCDH11Y
AGTGCAACGGATGCAGACAG	(Erlotinib-DMSO)	0.215328	PCDH11Y
ATGGAGACTTGACAGAACAG	(Erlotinib-DMSO)	-4.0697	PDS5B
AGTACGCAAAGAAGCCATGA	(Erlotinib-DMSO)	-3.85704	PDS5B
GGATCTAGGCTCTTATGCAG	(Erlotinib-DMSO)	-1.90909	PDS5B
GGAACATCTCATAACACCAT	(Erlotinib-DMSO)	-1.47652	PDS5B
GTGATGTAAAACAGGAAGCA	(Erlotinib-DMSO)	-0.610676	PDS5B
GGGGCTGCCTTTGATGGAGA	(Erlotinib-DMSO)	-5.03743	PGM1
CCAGGTCAGCTGCATAGGTG	(Erlotinib-DMSO)	-2.36419	PGM1
GTTAACTGCCGAGTTCGCAG	(Erlotinib-DMSO)	-1.13141	PGM1
AGGTGAGGTTGGGGTCAGGG	(Erlotinib-DMSO)	0.560029	PGM1
GGGCACCGAGTTCTTCACAG	(Erlotinib-DMSO)	1.3057	PGM1
CAACTGGATATAAATCCCAG	(Erlotinib-DMSO)	-4.67973	PIK3CB
AGGATGTCTGCCATAGCAGG	(Erlotinib-DMSO)	-3.87221	PIK3CB
TAAGAAATGGTAGCTTCCCG	(Erlotinib-DMSO)	-2.49382	PIK3CB
AGACATCCTTGACATCTGGG	(Erlotinib-DMSO)	-2.19569	PIK3CB
GACAAGAAGTTGTGACCCAG	(Erlotinib-DMSO)	-0.658396	PIK3CB
TCTGCAAATAAAGTACCCTG	(Erlotinib-DMSO)	-3.74515	PKN2
ATGGCGTCCAACCCCGAACG	(Erlotinib-DMSO)	-3.68863	PKN2
AAGTCCTCTTGAACTTCGGA	(Erlotinib-DMSO)	-3.45135	PKN2
GATTCTGCTCACGGAACTGC	(Erlotinib-DMSO)	-3.07644	PKN2
GCAGTTGCTGAGCTGTACCA	(Erlotinib-DMSO)	-2.06137	PKN2
GATCTGGAGCCAGCCCGAGC	(Erlotinib-DMSO)	-3.56195	PM20D2
GGCGGAGTGCATCGACGAGG	(Erlotinib-DMSO)	-2.99862	PM20D2
GCTACTGAAGCTGCGCTCGG	(Erlotinib-DMSO)	-2.84087	PM20D2
TCAGTAGCTCCAGCTCGGAG	(Erlotinib-DMSO)	-0.552727	PM20D2
GGGCAGCATGAGGCCCGGAG	(Erlotinib-DMSO)	-0.528585	PM20D2
AAGTCTGGGGTGGGAAGCGG	(Erlotinib-DMSO)	-4.33858	PPCS
ACGTAACCAACACCACCCGC	(Erlotinib-DMSO)	-4.18768	PPCS
GAACAGGACCCCGTAGCCGG	(Erlotinib-DMSO)	-3.39605	PPCS
GAAGCGGTGGGCATAGGGGA	(Erlotinib-DMSO)	-3.0967	PPCS
GCGGACAGCCAAGTCTGGGG	(Erlotinib-DMSO)	0.664841	PPCS
GTTACAGCCAGAGTGCCAGG	(Erlotinib-DMSO)	-3.50928	RASSF2
GCATCTGCAGGCGAATGGGC	(Erlotinib-DMSO)	-2.3211	RASSF2
GCATCTGGTCACCCTCCGGC	(Erlotinib-DMSO)	-2.26828	RASSF2
GGGCTCCTGAACATCTCCTG	(Erlotinib-DMSO)	-2.23714	RASSF2
GAGGTGGATGCCCCGCCGGA	(Erlotinib-DMSO)	-2.08241	RASSF2
CAGGTGCTGGTGGTCAATGG	(Erlotinib-DMSO)	-4.5753	RB1CC1
GTTCATAAAACACTACAGGG	(Erlotinib-DMSO)	-3.74638	RB1CC1
GTAGTTTTAGGAATAGCAGG	(Erlotinib-DMSO)	-3.39584	RB1CC1
GACCAGATGATTGCTAGCTG	(Erlotinib-DMSO)	-2.68513	RB1CC1
CTAACAGCTCTATTACGAGG	(Erlotinib-DMSO)	-0.732334	RB1CC1
TTTGGGCTTCCCAGGAGTAG	(Erlotinib-DMSO)	-3.70284	RGS2
ATGGACAAGAGCGCAGGCAG	(Erlotinib-DMSO)	-3.59519	RGS2
TCAACACGACTGCAGACCCA	(Erlotinib-DMSO)	-1.60641	RGS2
AGGCAGTGGCCACAAGAGCG	(Erlotinib-DMSO)	-0.140698	RGS2
CTCCTGAGGAAGCACAGCTG	(Erlotinib-DMSO)	0.637831	RGS2
ACTGTGGGCACATACACCTC	(Erlotinib-DMSO)	-4.88671	RHOA
AATCACCAGTTTCTTCCGGA	(Erlotinib-DMSO)	-3.57043	RHOA
ATTGTTGGTGATGGAGCCTG	(Erlotinib-DMSO)	-2.28086	RHOA
GAGCAAGCATGTCTTTCCAC	(Erlotinib-DMSO)	-1.57692	RHOA
CACATAGTTCTCAAACACTG	(Erlotinib-DMSO)	-1.28401	RHOA
GGAGTGCCGTTAGCAGGAAG	(Erlotinib-DMSO)	-5.28726	RIC8A
GGAGCCGCAAGTCAAAGAAC	(Erlotinib-DMSO)	-4.94219	RIC8A
CCGGGCGGTTGCAGAAGCCG	(Erlotinib-DMSO)	-4.27241	RIC8A
TCTGCAGCCAGATGACACGG	(Erlotinib-DMSO)	-4.16855	RIC8A
TCTGCGGTCATACAACCAGG	(Erlotinib-DMSO)	-3.89472	RIC8A
GCTTCAGTGCTCAGAAACTG	(Erlotinib-DMSO)	-3.23429	RPS6KA1
AGGGTGGCTTGATCTCACGA	(Erlotinib-DMSO)	-3.23037	RPS6KA1
AGGGTGGCTTGATCTCACGA	(Erlotinib-DMSO)	-3.10545	RPS6KA1
TTTGCAGGTGATGTTCACGG	(Erlotinib-DMSO)	-1.72266	RPS6KA1
CGGGCTCCCTGCCCTTCCAG	(Erlotinib-DMSO)	-1.34461	RPS6KA1
AAAGTCACCCGGCCTGACAG	(Erlotinib-DMSO)	-1.33058	RPS6KA1
GCTTCAGTGCTCAGAAACTG	(Erlotinib-DMSO)	-0.887028	RPS6KA1
AAAGTCACCCGGCCTGACAG	(Erlotinib-DMSO)	0.191031	RPS6KA1
TGGCTGTAAAATACCTGCAA	(Erlotinib-DMSO)	-3.7228	SACM1L
ATTTGACCCATACTTTGCAG	(Erlotinib-DMSO)	-3.32003	SACM1L
GTGGTTGTGCAGGATGGCGA	(Erlotinib-DMSO)	-3.0773	SACM1L
GGTCTTGTGACAGCTGAAGG	(Erlotinib-DMSO)	-0.801428	SACM1L
ACTGGGCACAATCCATCTGG	(Erlotinib-DMSO)	1.20867	SACM1L
AACCTACTCGGATGTAGTGT	(Erlotinib-DMSO)	-3.60321	SAR1A
GCTCAACTTTGGATTCCACG	(Erlotinib-DMSO)	-3.58698	SAR1A
GATGTAGTGTTGGAACATGT	(Erlotinib-DMSO)	-2.05484	SAR1A
GATCTTGGTGGGCACGAGCA	(Erlotinib-DMSO)	-2.05304	SAR1A
AAATGGCTTTACCTAGGAAC	(Erlotinib-DMSO)	-1.30884	SAR1A
GGAGGAGGGCCGCCAGCATG	(Erlotinib-DMSO)	-3.50193	SCGB2A1
GCTGCTGATGGTCCTCATGC	(Erlotinib-DMSO)	-3.20562	SCGB2A1
ACTCACCTGCATAGCAGTGC	(Erlotinib-DMSO)	-3.0558	SCGB2A1
CCTCGCCATGAAGCTGCTGA	(Erlotinib-DMSO)	-2.48722	SCGB2A1
CTGCATAGCAGTGCAGGAGG	(Erlotinib-DMSO)	-0.862527	SCGB2A1
TGAGCGACAACGAGATCCAG	(Erlotinib-DMSO)	-3.47206	SCRIB
TGTCCCAGAACCTGCTGCGG	(Erlotinib-DMSO)	-2.56433	SCRIB
CGTGTCGGAAAACCGGCTGG	(Erlotinib-DMSO)	-2.33327	SCRIB
CCAGCGGTTGCCTCCCGAGG	(Erlotinib-DMSO)	-2.31162	SCRIB
GCAGCAGCTCCTCCAGGCTG	(Erlotinib-DMSO)	0.174154	SCRIB
GCGCTCTCCCAGCAAAGCAG	(Erlotinib-DMSO)	-4.01456	SEC61B
GCACTAACGTGGGATCCTCA	(Erlotinib-DMSO)	-3.28089	SEC61B
GCAGGGTTCCTTACCTCTGC	(Erlotinib-DMSO)	-2.87442	SEC61B
CAAAGCAGTGGCCGCCCGGG	(Erlotinib-DMSO)	-0.504408	SEC61B
GACAGTGGATCCCGCCGCCC	(Erlotinib-DMSO)	-0.200495	SEC61B
GCGCAGGGTCACGGTCACTG	(Erlotinib-DMSO)	-3.45006	SIAE
GGAGATGTCTGGCTCTGTAG	(Erlotinib-DMSO)	-2.96762	SIAE
TGGGAGAGACAGAGAGGATG	(Erlotinib-DMSO)	-2.56236	SIAE
GCTGCAGAAGGAGCCTGCTG	(Erlotinib-DMSO)	-2.30885	SIAE
TCAAGCAGAGCAGGAGCTGG	(Erlotinib-DMSO)	0.193265	SIAE
GGGCAAGCAGCACCAGGAAG	(Erlotinib-DMSO)	-3.91462	SLPI
GCCTTCACCATGAAGTCCAG	(Erlotinib-DMSO)	-2.96888	SLPI
CAGGAAGGGGAAGAGGCCGC	(Erlotinib-DMSO)	-2.43191	SLPI
CCAGAGCCTTCCACAGCCCA	(Erlotinib-DMSO)	-2.40602	SLPI
CCAAGGTGCCAGAGTTCCCA	(Erlotinib-DMSO)	0.214447	SLPI
GTGGCGGCCAGCAATGCCAG	(Erlotinib-DMSO)	-3.01195	SP5
GTGCTTGCCCAGGTCCGGGG	(Erlotinib-DMSO)	-2.802	SP5
GTTCCGGAGGACGGCCACCG	(Erlotinib-DMSO)	-2.27161	SP5
GCAAGCCGTAGCCATGGCCG	(Erlotinib-DMSO)	-2.21766	SP5
CCTGCAGCGAGTCGTTCCGG	(Erlotinib-DMSO)	-1.84322	SP5
GATTGCAAAACATACACCCG	(Erlotinib-DMSO)	-3.98964	SPAG6
AGAGTTAGCACAGACAGTAG	(Erlotinib-DMSO)	-3.38508	SPAG6
AGAACTGTCACAAGCTGTGG	(Erlotinib-DMSO)	-2.84928	SPAG6
TCAGGTTTCAAAACATTCCG	(Erlotinib-DMSO)	-1.41782	SPAG6
GCCAATGAATAAACAAGCTG	(Erlotinib-DMSO)	-1.00856	SPAG6
CCCTCCAAGCCACAAAACTG	(Erlotinib-DMSO)	-4.97724	SPTLC1
AGAGTAAGCAGGAATAGCAC	(Erlotinib-DMSO)	-4.12408	SPTLC1
ATCTCTAAAGAAGTATGGCG	(Erlotinib-DMSO)	-2.70931	SPTLC1
GTGCTACTCACCTTAACCCT	(Erlotinib-DMSO)	-1.99091	SPTLC1
TTGGATTGTTGGATAACCCT	(Erlotinib-DMSO)	-1.28783	SPTLC1
CTGAAGGCCAAATCAACCAC	(Erlotinib-DMSO)	-3.56262	STRAP
CAGACGCCGCTCACCTGCTC	(Erlotinib-DMSO)	-2.8777	STRAP
GACTTGAACAAACCTGAAGC	(Erlotinib-DMSO)	-2.64894	STRAP
CTCTGGCCACACGCGACCCG	(Erlotinib-DMSO)	-2.58795	STRAP
CAAGACTGTGGATTTCACGC	(Erlotinib-DMSO)	1.39056	STRAP
TCGGTGCAGCGGAAGCGCAG	(Erlotinib-DMSO)	-4.17905	TADA2B
TGTCCTGGCACTCGGTGCAG	(Erlotinib-DMSO)	-3.95024	TADA2B
GAAGCGCAGCGGGCTCACCT	(Erlotinib-DMSO)	-2.8496	TADA2B
CGCCGGCCGAGAAGCACTCG	(Erlotinib-DMSO)	-1.77933	TADA2B
CTGCGTGTACTGCCTGGCCG	(Erlotinib-DMSO)	-1.64538	TADA2B
GTCACAGACTGCTGAAGAGA	(Erlotinib-DMSO)	-4.13991	TAF5L
GCGTACCGAGCAGATTCAGA	(Erlotinib-DMSO)	-3.95346	TAF5L
AAACAGTCCGAAGAGCACAG	(Erlotinib-DMSO)	-2.40399	TAF5L
ACAAAGAGAGGATAGAGGAG	(Erlotinib-DMSO)	-1.85624	TAF5L
GTAAGGTGAGGACTTTGCAC	(Erlotinib-DMSO)	0.235753	TAF5L
GCAGCTCCTGGAAGTCGATG	(Erlotinib-DMSO)	-3.61755	TCFL5
GTGGTCGTGAAGCTCAGCCC	(Erlotinib-DMSO)	-2.24791	TCFL5
CAACTCGGCGCTGCTGGCGG	(Erlotinib-DMSO)	-2.24414	TCFL5
GAGCCTGGTGGAGATGACGG	(Erlotinib-DMSO)	-1.79398	TCFL5
GACCACCGACCTGAGCCTGG	(Erlotinib-DMSO)	-1.74475	TCFL5
ACATGGTGGATAGATAGCCA	(Erlotinib-DMSO)	-3.28568	TEAD1
AGATACATCAAACTCAGGAC	(Erlotinib-DMSO)	-3.20889	TEAD1
AACTCAGGACAGGCAAGACG	(Erlotinib-DMSO)	-3.18094	TEAD1
CATCGAGCAAAGCTTTCAGG	(Erlotinib-DMSO)	-2.12602	TEAD1
TAAGGCCCTGCAGCACATGG	(Erlotinib-DMSO)	0.690413	TEAD1
GGATTGATACTGTCAACCGG	(Erlotinib-DMSO)	-3.7996	TEKT2
GGATGAGCTGCATAAAGAGG	(Erlotinib-DMSO)	-3.52421	TEKT2
GAGACACTAGAGATCGACAG	(Erlotinib-DMSO)	-1.71622	TEKT2
TGACAACAGGACTCGACTGG	(Erlotinib-DMSO)	-0.43723	TEKT2
AAGCCGGCGAGACATTGATG	(Erlotinib-DMSO)	1.08656	TEKT2
GGGGAGTTTTGCCATTACGA	(Erlotinib-DMSO)	-2.854	TGIF2-C20orf24
GTTCCGACAGATCATTGCTG	(Erlotinib-DMSO)	-2.71625	TGIF2-C20orf24
GAGGGTTCTTGGGAATAGCA	(Erlotinib-DMSO)	-2.65214	TGIF2-C20orf24
GTAGGTAATTGCTGAAGTAG	(Erlotinib-DMSO)	-2.15899	TGIF2-C20orf24
AAACTCCCCAAATGACACCC	(Erlotinib-DMSO)	-2.07348	TGIF2-C20orf24
GGAGTGAGAAGATTTGGCCG	(Erlotinib-DMSO)	-4.25846	TJP1
GATAGTTTGGCAGCAAGAGA	(Erlotinib-DMSO)	-4.18896	TJP1
TGATCACACACCTAAAACAG	(Erlotinib-DMSO)	-1.59698	TJP1
GGAGTGGTGTGGTTAACAGA	(Erlotinib-DMSO)	-0.730373	TJP1
GAGATCGTGACCGGCTGCGG	(Erlotinib-DMSO)	1.13961	TJP1
ACGATGTTGAAGATGGTCAG	(Erlotinib-DMSO)	-5.25668	TM9SF2
GCAGGTAGAAAGCGCCGCTC	(Erlotinib-DMSO)	-2.89964	TM9SF2
AGCGACAGCAGCAACAGCCG	(Erlotinib-DMSO)	-2.86611	TM9SF2
CGGTGTTGTCTCCACCTCGG	(Erlotinib-DMSO)	-1.40503	TM9SF2
GAAGTTGACGGGCGCCAGGC	(Erlotinib-DMSO)	0.140035	TM9SF2
ACATCCAGAACCAATCAGAG	(Erlotinib-DMSO)	-4.87756	TM9SF3
CAAGAAGATCACCATCATGA	(Erlotinib-DMSO)	-4.04547	TM9SF3
GTGTTCGTGCTCGTCCGCCC	(Erlotinib-DMSO)	-2.758	TM9SF3
GCTGCCTGGCGCTCTTGGCG	(Erlotinib-DMSO)	-2.55264	TM9SF3
CAGCAGCAGCAGCCACAGCG	(Erlotinib-DMSO)	-0.661468	TM9SF3
GCCGCCTGCCAGCAGCACAG	(Erlotinib-DMSO)	-2.59667	TMEM140
ACAGTGATGAGAGAGCGTGG	(Erlotinib-DMSO)	-2.57328	TMEM140
GCAGCACAGAGGACACAGCC	(Erlotinib-DMSO)	-2.55339	TMEM140
GGCAGATGACCACAATCACG	(Erlotinib-DMSO)	-2.32152	TMEM140
GAGAGCGTGGCGGCTGGCAG	(Erlotinib-DMSO)	2.69	TMEM140
GTGCACGAAGATCTCGAAGG	(Erlotinib-DMSO)	-3.48927	TMEM203
GCAGCACAGAGAACACCAAC	(Erlotinib-DMSO)	-2.67549	TMEM203
GAAGAGGCGCACGGACACGA	(Erlotinib-DMSO)	-2.34971	TMEM203
GTAGGTGCTGAGCCCGTCAG	(Erlotinib-DMSO)	-2.10915	TMEM203
CGAACACGTTCCACCAGGAG	(Erlotinib-DMSO)	-1.73817	TMEM203
GGATGCTGAGAATGAGCCTA	(Erlotinib-DMSO)	-2.93098	UBE3B
GACTCCGACAGAGAAAACTC	(Erlotinib-DMSO)	-2.73574	UBE3B
GAGGTCCTTAGAACAAGCCA	(Erlotinib-DMSO)	-2.60914	UBE3B
TGTGCAGAAGGAACGGGAGC	(Erlotinib-DMSO)	-1.99178	UBE3B
GAAAACTCCGGACATGGGCC	(Erlotinib-DMSO)	-1.92943	UBE3B
CTCTGCCAGAAACTCAGGGT	(Erlotinib-DMSO)	-5.31456	UGDH
AGACAGAGTACTGATTGGAG	(Erlotinib-DMSO)	-3.96002	UGDH
AGAGGGCCAGAGAGCTGTGC	(Erlotinib-DMSO)	-3.47489	UGDH
TGTGTGCTGTATATGAGCAC	(Erlotinib-DMSO)	-3.13585	UGDH
GGAGGGGATGAAACTCCAGA	(Erlotinib-DMSO)	-3.02425	UGDH
GCATATTCACGAGCATGCGA	(Erlotinib-DMSO)	-5.36857	USP22
ACAACTGGAAGCAGAACCTG	(Erlotinib-DMSO)	-4.85242	USP22
GCACCTGGGCAGCTTCAAGG	(Erlotinib-DMSO)	-3.93149	USP22
GCCATTGATCTGATGTACGG	(Erlotinib-DMSO)	-2.81933	USP22
GTGTCCCGGCCAGAGCCCGA	(Erlotinib-DMSO)	-0.088809	USP22
GGAACTTTTACCTGGCACGG	(Erlotinib-DMSO)	-3.66061	VCL
AGAGACTGTTCAAACCACTG	(Erlotinib-DMSO)	-3.60077	VCL
GGAATATCTTACAGTGGCAG	(Erlotinib-DMSO)	-2.84408	VCL
GATAATGCACGAGGAGGGCG	(Erlotinib-DMSO)	-1.73004	VCL
AGGACAAGGATCCTCACCGG	(Erlotinib-DMSO)	-1.17586	VCL
AGCAAGGGAGCTTACCCGAG	(Erlotinib-DMSO)	-4.44563	WASF2
GAGTGACTTTAACCTGTAGT	(Erlotinib-DMSO)	-3.42787	WASF2
TCGGTCGACCCTCTCAGCAA	(Erlotinib-DMSO)	-3.12192	WASF2
CTGGATCCCAAGGAAGAAGA	(Erlotinib-DMSO)	-2.1467	WASF2
CTTTCCAGGTAAATATGCAG	(Erlotinib-DMSO)	-1.22051	WASF2
GGGGAACACATGCTCAGAAG	(Erlotinib-DMSO)	-3.31169	WDR7
AAATGGACAGACATGGACCG	(Erlotinib-DMSO)	-3.23484	WDR7
CCACCTCACAGAACACTCCG	(Erlotinib-DMSO)	-2.96279	WDR7
TAGAAGAACCGAGTAACAGG	(Erlotinib-DMSO)	-1.81387	WDR7
GAAGGAAGGCTTTTATGCCA	(Erlotinib-DMSO)	-0.837241	WDR7
GCAGATGGCACGCTGCCGCG	(Erlotinib-DMSO)	-3.06689	WNT7B
GCGTCCTGTACGTGAAGCTC	(Erlotinib-DMSO)	-2.88824	WNT7B
GTTCCCTTGGCTGCAGGCAG	(Erlotinib-DMSO)	-2.76614	WNT7B
GTTGGCTCCCAGGGCCACCA	(Erlotinib-DMSO)	-2.74912	WNT7B
CCACAGAGCACTGTCATCCG	(Erlotinib-DMSO)	-1.3077	WNT7B
ACATCGATCAGACAACAACA	(Erlotinib-DMSO)	-5.91547	YAP1
CCACCCATGACGCCTCCCTG	(Erlotinib-DMSO)	-2.79436	YAP1
GGGACAGCATGGCCTTCCTG	(Erlotinib-DMSO)	-2.07392	YAP1
GCAGTCGCATCTGTTGCTGC	(Erlotinib-DMSO)	-1.53247	YAP1
GCTCCCCAGAGCCCACAGGG	(Erlotinib-DMSO)	-1.05954	YAP1
CAGCACCACAGCTCCCACAG	(Erlotinib-DMSO)	-2.89199	ZNF319
AAAGCCCTTCAAGCACCTGT	(Erlotinib-DMSO)	-2.55242	ZNF319
GCGGGTGCTGCGGGAAGCGA	(Erlotinib-DMSO)	-2.49675	ZNF319
GCATGGTGCTGAGGCTGCGG	(Erlotinib-DMSO)	-2.47322	ZNF319
GGGGTGACAGTGGAAGGCGC	(Erlotinib-DMSO)	-0.709324	ZNF319

## Sheet: Positively selected hits
barcode (sgRNA sequence)	comparison_name	Log2 FC	symbol
ATGCTGACCGGGGTGACCGA	(Erlotinib-DMSO)	4.29051	ABHD8
GAGGATGCGGATGATGGTGG	(Erlotinib-DMSO)	2.21711	ABHD8
CAGGCAACAGAAGATACCGT	(Erlotinib-DMSO)	1.77558	ABHD8
GCATCCTCGGATGCAGCCCA	(Erlotinib-DMSO)	-0.395717	ABHD8
GGTGGAGCTGGCAGATCCGG	(Erlotinib-DMSO)	-1.27059	ABHD8
GCAGCGTACACACCTGGCAC	(Erlotinib-DMSO)	2.59963	ABLIM3
GGGGTGGTAAGTGCGGCCCA	(Erlotinib-DMSO)	2.18254	ABLIM3
GCTGTGGAGACACCTGCAAA	(Erlotinib-DMSO)	1.62759	ABLIM3
CTGCAGCGTCATCCTCACCG	(Erlotinib-DMSO)	1.38583	ABLIM3
ATGACATTGGAGCTGCCCCG	(Erlotinib-DMSO)	-2.03892	ABLIM3
CAGCAATGATGACCGCCCGG	(Erlotinib-DMSO)	3.59276	ACIN1
GGAGGGCAGTGTTGAAGATG	(Erlotinib-DMSO)	2.87998	ACIN1
AGCCTGGTCGGAAACGACGC	(Erlotinib-DMSO)	1.86297	ACIN1
GGAGAAGGAGGAAGTGACCA	(Erlotinib-DMSO)	1.39319	ACIN1
GACTTGGTCTGCAATAGGCA	(Erlotinib-DMSO)	0.812088	ACIN1
CACCATCGGGCACTAAGCCG	(Erlotinib-DMSO)	4.77258	ACRBP
TGAGAGGCTCAGCAACAACG	(Erlotinib-DMSO)	3.49608	ACRBP
GAGAGGGCTGCCTGGAGTGG	(Erlotinib-DMSO)	-1.38108	ACRBP
GAGTGAGGGAAGGAAGCCAG	(Erlotinib-DMSO)	-3.06809	ACRBP
AGAGGGTCTCACCTGTGAAG	(Erlotinib-DMSO)	-3.56372	ACRBP
GAAGTGGATCTCATTGGCAG	(Erlotinib-DMSO)	2.92229	AMBRA1
GAACTGGCTGTGATTGCAGG	(Erlotinib-DMSO)	1.91022	AMBRA1
TGACACACCATGGAGTACGG	(Erlotinib-DMSO)	1.54727	AMBRA1
TGGTAGAAGATAAAACCCGG	(Erlotinib-DMSO)	0.194842	AMBRA1
GCAGGAGCTGAGCCGTAGGG	(Erlotinib-DMSO)	0.17989	AMBRA1
GATGTGAGTGCTAAATACAG	(Erlotinib-DMSO)	2.24347	ARID4B
TCCTCTGGGGCAGGATGCGG	(Erlotinib-DMSO)	2.17577	ARID4B
TAGCTCTAGCAGTGAAGCAG	(Erlotinib-DMSO)	2.07197	ARID4B
GTGCCCACTGTCAAATAGGG	(Erlotinib-DMSO)	-1.56538	ARID4B
CAACATAAAGGTAGAAGCTG	(Erlotinib-DMSO)	-1.68734	ARID4B
ATATCTCTGAAACTTGCCAG	(Erlotinib-DMSO)	6.70797	ARIH2
AGTGCTGCTCCCAGCAGCTG	(Erlotinib-DMSO)	6.36094	ARIH2
GGGGTCTGACAGCAATGAAG	(Erlotinib-DMSO)	3.01093	ARIH2
GCTGGATGCTAAGATGTCAG	(Erlotinib-DMSO)	1.90462	ARIH2
GCTGACAGGCCAGAGAGAGT	(Erlotinib-DMSO)	1.06252	ARIH2
GCCGGGCTCGGGAAGTGGGT	(Erlotinib-DMSO)	5.49536	ARMCX6
GCACAGACTTGAGCATGGGC	(Erlotinib-DMSO)	2.78565	ARMCX6
TGACAGTGAGAAGCTGGAGG	(Erlotinib-DMSO)	2.73198	ARMCX6
GAAGTGGGTTGGATGGCGGC	(Erlotinib-DMSO)	-0.325322	ARMCX6
GCAGGACTGATGATTGGGGC	(Erlotinib-DMSO)	-2.97353	ARMCX6
GGTCAGATGTGGCAAAGCAA	(Erlotinib-DMSO)	3.4635	ATP2C1
TCTTACCACAGTGATACTGA	(Erlotinib-DMSO)	2.33014	ATP2C1
CTAATGGGGAAGCCAACAGA	(Erlotinib-DMSO)	1.50648	ATP2C1
TGTACTACATACCAGAGCAA	(Erlotinib-DMSO)	1.43341	ATP2C1
GAACTCTATCCCCAACAGAA	(Erlotinib-DMSO)	-0.876155	ATP2C1
TGGCTCCGTAGGCCACACCG	(Erlotinib-DMSO)	1.22195	ATP5I
CAAGATGGTGCCACCGGTGC	(Erlotinib-DMSO)	1.21635	ATP5I
AGCGGAGAGACCTGCACCGG	(Erlotinib-DMSO)	0.533316	ATP5I
GCCTGGATCACCTTGATGAG	(Erlotinib-DMSO)	0.385768	ATP5I
GGCCACACCGAGGAACAGGG	(Erlotinib-DMSO)	0.211277	ATP5I
AGGGCAATCAGAAGAAGAAA	(Erlotinib-DMSO)	1.86684	ATP5SL
ATGTGGAATGGGCGTATCAG	(Erlotinib-DMSO)	1.45991	ATP5SL
CCACTGCCGCACCCAGGCGA	(Erlotinib-DMSO)	0.988191	ATP5SL
CAACTATTTCTACGATGTGG	(Erlotinib-DMSO)	0.756762	ATP5SL
ATCAGGGGCATCCATCGCCT	(Erlotinib-DMSO)	0.304602	ATP5SL
GCAAGGCACTGAAGGACCAC	(Erlotinib-DMSO)	3.77268	AWAT2
GAGGTTGACAGCAATCACAG	(Erlotinib-DMSO)	3.34922	AWAT2
GCCTCACACAGGTAAACCGG	(Erlotinib-DMSO)	0.308445	AWAT2
GAAGGACCTCAAGACTGCCC	(Erlotinib-DMSO)	-0.348531	AWAT2
GCAGGATGCTTACCTCGCTG	(Erlotinib-DMSO)	-1.69203	AWAT2
GAACCGTCAGACAGTACTAG	(Erlotinib-DMSO)	5.45491	BAP1
AGTGGACAGACAAGGCCCGG	(Erlotinib-DMSO)	3.03365	BAP1
GGCGGACTGGAACTCGGCTG	(Erlotinib-DMSO)	2.83499	BAP1
TGACTATGAGGATGACGAGG	(Erlotinib-DMSO)	1.28493	BAP1
GAAGGGAACAGGGAAGCCAG	(Erlotinib-DMSO)	-2.92167	BAP1
TGAGAGTGTCAACAAGGAGA	(Erlotinib-DMSO)	1.0532	BCL2L2-PABPN1
GACCTGTAGACGCGACCCCG	(Erlotinib-DMSO)	0.573482	BCL2L2-PABPN1
ACCACTGGTGGGACAAGTGC	(Erlotinib-DMSO)	0.523629	BCL2L2-PABPN1
CAAGGAGATGGAACCACTGG	(Erlotinib-DMSO)	0.506285	BCL2L2-PABPN1
GCTGACTGGATCCACAGCAG	(Erlotinib-DMSO)	0.22614	BCL2L2-PABPN1
GATGTACGTGATGCCCGCCG	(Erlotinib-DMSO)	4.73434	BLNK
AGAGAGCCCTGCTGACGAAG	(Erlotinib-DMSO)	3.73469	BLNK
ACTTTACCTCATCCTCAAGG	(Erlotinib-DMSO)	-0.375623	BLNK
AAGACAATCGATCAAGCCAG	(Erlotinib-DMSO)	-4.23993	BLNK
GAAGTGTCTTGCTGAAGGGT	(Erlotinib-DMSO)	-4.49654	BLNK
GTGAAGTGGATCCTAAAGAG	(Erlotinib-DMSO)	4.45285	BTAF1
ACAGAGATCCAGGGATGCAG	(Erlotinib-DMSO)	3.6938	BTAF1
GGGAGCCAGAAGAAAAGAGA	(Erlotinib-DMSO)	2.95062	BTAF1
GACCCACCTGGAGACCGCCA	(Erlotinib-DMSO)	2.91251	BTAF1
AAAGCTCATGGGAAAAGTGG	(Erlotinib-DMSO)	2.55472	BTAF1
GACCTGGACCGCCCCTAACG	(Erlotinib-DMSO)	5.0252	C7orf33
AGGGACACTCTTCAAGGCTG	(Erlotinib-DMSO)	3.15204	C7orf33
CCACACCAAAACATGAACCG	(Erlotinib-DMSO)	0.685153	C7orf33
GGAGGGCTTCACATTCACAT	(Erlotinib-DMSO)	-1.54787	C7orf33
GTTTGGGTCCACGTTAGGGG	(Erlotinib-DMSO)	-2.53345	C7orf33
GCAGAGAACGATCCAAGAGG	(Erlotinib-DMSO)	4.01442	C7orf55-LUC7L2
GGAGGAATCCCAGAAAGTAA	(Erlotinib-DMSO)	3.63671	C7orf55-LUC7L2
GAGAAGAAAGGGAGAAGCTG	(Erlotinib-DMSO)	2.76632	C7orf55-LUC7L2
GAATGACTGCAGATGATCCA	(Erlotinib-DMSO)	-0.40964	C7orf55-LUC7L2
GGATGAAGTAGAGAAAGCAC	(Erlotinib-DMSO)	-1.02873	C7orf55-LUC7L2
ACTGGCTAAAAGTATTGCCA	(Erlotinib-DMSO)	4.79069	CAGE1
TGAAAAGGAAGTCACAGCAG	(Erlotinib-DMSO)	1.50654	CAGE1
TCAGCATCTCTCCACTGCAG	(Erlotinib-DMSO)	1.21409	CAGE1
CCGCCTCTAATCCACTGCAG	(Erlotinib-DMSO)	0.964345	CAGE1
AGAGGCGGGCTTCTAGGAGG	(Erlotinib-DMSO)	-1.34614	CAGE1
CTGACTGAAGAGCAGATTGC	(Erlotinib-DMSO)	1.45563	CALM2
CCCTGAATTTCTGACAATGA	(Erlotinib-DMSO)	1.42649	CALM2
GGAACTGTAATGAGATCTCT	(Erlotinib-DMSO)	1.03803	CALM2
GTCCTGTAACTCTGCTTCTG	(Erlotinib-DMSO)	0.547414	CALM2
AGCATTCCGTGTGTTTGATA	(Erlotinib-DMSO)	0.065994	CALM2
ACTGGAGGCAACAAGGGCAT	(Erlotinib-DMSO)	5.28479	CBR1
CATGTAGCGCTGGTGACTGG	(Erlotinib-DMSO)	2.04103	CBR1
GGGACGTGGTGCTCACGGCG	(Erlotinib-DMSO)	2.00171	CBR1
CCGGCACAGGTCGCGCACGA	(Erlotinib-DMSO)	-1.4612	CBR1
GTCCGGCATCCATGTAGCGC	(Erlotinib-DMSO)	-2.43409	CBR1
GGCCTCCAACAAAACTACAT	(Erlotinib-DMSO)	1.29587	CBX3
CTAGATCGACGTGTAGTGAA	(Erlotinib-DMSO)	1.11454	CBX3
AGAGCCTGAAGAATTTGTCG	(Erlotinib-DMSO)	1.08563	CBX3
ACACAGTGCTGACAATACTT	(Erlotinib-DMSO)	0.542602	CBX3
GGAATATTTCCTGAAGTGGA	(Erlotinib-DMSO)	0.0802075	CBX3
GAGTCTGCGGCAAGCAGCAG	(Erlotinib-DMSO)	2.03135	CCDC136
GACAGAGCTGGAGGAGCTGC	(Erlotinib-DMSO)	2.02818	CCDC136
GAAGAACAAGTGCAGAAAGG	(Erlotinib-DMSO)	1.81591	CCDC136
ACTCCCAGCTCTCTATGAGG	(Erlotinib-DMSO)	-0.156675	CCDC136
GCAGCTGGTGGCAGAACTGG	(Erlotinib-DMSO)	-0.797742	CCDC136
CTGTGGTTCTAAGATTAGGC	(Erlotinib-DMSO)	4.0607	CCNYL1
CTGAGCAAATCTCAAACGGA	(Erlotinib-DMSO)	1.32935	CCNYL1
TTGGATTTCGGAGAGGGCGA	(Erlotinib-DMSO)	0.635329	CCNYL1
AGCGACCGCGAGATGCCCGA	(Erlotinib-DMSO)	0.171766	CCNYL1
CTGCGCGTCCGACATCTACG	(Erlotinib-DMSO)	-0.00932934	CCNYL1
CCTGGGTTTCCGGCCAGCGG	(Erlotinib-DMSO)	4.25508	CD248
CCAGCGTGTGGACAGCCTGG	(Erlotinib-DMSO)	1.34932	CD248
GAGCAGCAGTGTGAGCCCGG	(Erlotinib-DMSO)	0.644803	CD248
ACGGCGCCGCACCTTCCTGG	(Erlotinib-DMSO)	0.236994	CD248
GAAGAGAGCGTAGCAGCTGC	(Erlotinib-DMSO)	-0.00671681	CD248
GAGAAAACTGGAAATGACCT	(Erlotinib-DMSO)	5.84952	CD300LF
AGTGTGTTTACAGATCAGGC	(Erlotinib-DMSO)	2.0152	CD300LF
GCTCACCTGAGAGCCAGAAG	(Erlotinib-DMSO)	1.79722	CD300LF
GCAGGAGGTGAAGAGGGACC	(Erlotinib-DMSO)	-0.521273	CD300LF
GGAGCAGGTAGAGTGTCAGC	(Erlotinib-DMSO)	-2.29329	CD300LF
AGTAGAAGATCCGGACGAGG	(Erlotinib-DMSO)	7.38886	CEBPZ
ACTGCCTCCTCGGGGCGCCA	(Erlotinib-DMSO)	0.409862	CEBPZ
GTTACGGCTCGGAGGCACCA	(Erlotinib-DMSO)	0.000641294	CEBPZ
GATACAACATCCTGAGGCTG	(Erlotinib-DMSO)	-0.0542979	CEBPZ
GCAATCGATGACCTTCAGCA	(Erlotinib-DMSO)	-1.64531	CEBPZ
GAATCCACAAAATGACCTGC	(Erlotinib-DMSO)	2.21493	CHD8
TAATCCAGACTACGTAGAGG	(Erlotinib-DMSO)	2.00047	CHD8
AGGAAGGCGAGAAGAAACGC	(Erlotinib-DMSO)	1.88745	CHD8
GAGGTATGTTCTGCTCACCG	(Erlotinib-DMSO)	1.20171	CHD8
GCACCCAGAACTCAAAAGGG	(Erlotinib-DMSO)	-1.00045	CHD8
GTGGCCTCCAACCAGAGCAA	(Erlotinib-DMSO)	2.41651	CIC
AAGGGGACTAAGGAGTGCCA	(Erlotinib-DMSO)	2.07523	CIC
GCAACCTGCCAGCCACCCAG	(Erlotinib-DMSO)	1.90538	CIC
GCTACTGACCGAACATGCCG	(Erlotinib-DMSO)	0.843739	CIC
CAGGAGGGCACAAGGAGACG	(Erlotinib-DMSO)	0.517282	CIC
GCGGAGCCCATCCTTTGGAG	(Erlotinib-DMSO)	2.47568	CLK3
GAGTGTGGAAGATGACAAGG	(Erlotinib-DMSO)	1.45855	CLK3
GGAGGCGCTGCTACAAGACC	(Erlotinib-DMSO)	1.05522	CLK3
TGAGCTACCGATGGAAGAGG	(Erlotinib-DMSO)	1.03644	CLK3
GGGTGAAGGCACCTTTGGCA	(Erlotinib-DMSO)	0.972207	CLK3
GGGATTACTGAAGTTACAGT	(Erlotinib-DMSO)	4.1958	CPD
GGTTTTGCTATAGATTCCAG	(Erlotinib-DMSO)	3.41073	CPD
ATTAATACCAGCCACTGAGA	(Erlotinib-DMSO)	2.43147	CPD
GAAAGAAGGACCAGCCACAG	(Erlotinib-DMSO)	2.32089	CPD
AGTAATCCCTGACACGACAG	(Erlotinib-DMSO)	0.473343	CPD
CAGCAAGCTCAGCATCGACG	(Erlotinib-DMSO)	4.08737	CSK
GCAATACATTCTGTACCGGA	(Erlotinib-DMSO)	2.86013	CSK
GGTCCTGCTCGGCAGTGCCG	(Erlotinib-DMSO)	2.83107	CSK
CAACTACGTCCAGAAGCGGG	(Erlotinib-DMSO)	2.8211	CSK
GAAGCGGGAGGGCGTGAAGG	(Erlotinib-DMSO)	0.893021	CSK
AATGGCACTATAGAAAGCCC	(Erlotinib-DMSO)	0.832619	CSMD3
GGAACAATGAGAGGATCCAG	(Erlotinib-DMSO)	0.510791	CSMD3
TATGGAATTAGAGAAGGCGA	(Erlotinib-DMSO)	0.431991	CSMD3
GAATACCAATCAATGCACGG	(Erlotinib-DMSO)	0.0757021	CSMD3
GATACCTTGACAATTGGCGA	(Erlotinib-DMSO)	0.0457098	CSMD3
GTCCCCAACAAAGTAGTCCT	(Erlotinib-DMSO)	0.938758	CTDSPL2
TCAGCTTCCACAGCCTGTCC	(Erlotinib-DMSO)	0.887041	CTDSPL2
ACAACTTGATATGGAACAGG	(Erlotinib-DMSO)	0.290186	CTDSPL2
GTGAGACCATCACTAAACAA	(Erlotinib-DMSO)	0.0888996	CTDSPL2
CGGAAAAGTCAAGTAAATGG	(Erlotinib-DMSO)	0.00222555	CTDSPL2
GATGCCTCACAGCACCAGGG	(Erlotinib-DMSO)	2.52209	CTNNA1
GCAGGTTATTAATGCTGCAC	(Erlotinib-DMSO)	1.95103	CTNNA1
GCCTCGCTTCACAGAAGAGC	(Erlotinib-DMSO)	1.70626	CTNNA1
GGACCCCTTGAGCTTCAGCG	(Erlotinib-DMSO)	0.394979	CTNNA1
GGAGAGCCAGTTTCTCAAGG	(Erlotinib-DMSO)	-0.376255	CTNNA1
GATTGTGGAGACCTACACGG	(Erlotinib-DMSO)	3.07932	CTNND1
GTAGTGGAAGTTCCTAGGAA	(Erlotinib-DMSO)	3.0741	CTNND1
GGGTGACCCGCATTGAGGAG	(Erlotinib-DMSO)	1.91106	CTNND1
GAAACTGATGAAGCATCCAC	(Erlotinib-DMSO)	1.1913	CTNND1
GTGGAGGCCCTCCTTTGCGC	(Erlotinib-DMSO)	0.606245	CTNND1
AGCTTGTTTACATAATCCGC	(Erlotinib-DMSO)	6.14973	CUL5
GCCAATGTTGAAAGACTTGG	(Erlotinib-DMSO)	5.79396	CUL5
ATAGGAAGTTGGTATGCCAG	(Erlotinib-DMSO)	5.68432	CUL5
GAGGAACATATCATTAGTGC	(Erlotinib-DMSO)	5.57495	CUL5
GGAATGCTGTGTAAATGCCC	(Erlotinib-DMSO)	5.14374	CUL5
GCTCGTGGCCCGAGTAGAGA	(Erlotinib-DMSO)	3.81064	DCTN4
AAGCTGTGTGGAGATGCTCG	(Erlotinib-DMSO)	3.30892	DCTN4
GCAGCTTGCTCAGAAAGAGA	(Erlotinib-DMSO)	-0.592586	DCTN4
AAGTCCGGCAAGGGTACTGA	(Erlotinib-DMSO)	-1.0747	DCTN4
GTAATAGGCTTTCTTCATGG	(Erlotinib-DMSO)	-1.47779	DCTN4
CTGTTCAGACGGGTACTCGC	(Erlotinib-DMSO)	3.40103	DDA1
GCCACTTACTCTGTTCAGAC	(Erlotinib-DMSO)	2.79404	DDA1
CGGGTAGGCAGGTAGACTGA	(Erlotinib-DMSO)	2.53358	DDA1
GGACTCCGTGTGCAAAGCCT	(Erlotinib-DMSO)	2.37146	DDA1
CAACCCTCCTGCAGAACCGA	(Erlotinib-DMSO)	1.51907	DDA1
GACGCGAGGCCAGCGTTCGG	(Erlotinib-DMSO)	5.82421	DDHD1
TGCTTCGAGCACCTGCCCGG	(Erlotinib-DMSO)	3.80142	DDHD1
CCACAACCACCACCTCGCGC	(Erlotinib-DMSO)	-0.373763	DDHD1
GAGCATAACGGCCGAGGCGG	(Erlotinib-DMSO)	-0.564488	DDHD1
AGCGAGGGTGAGAGCGGCGG	(Erlotinib-DMSO)	-1.18356	DDHD1
GAGAAGCGGTCCCAAAGGCT	(Erlotinib-DMSO)	1.66775	DDIT4
TGAGCGCGGCGGCCGATCTG	(Erlotinib-DMSO)	1.09656	DDIT4
CAAGGACGAGGGCGAAGAGG	(Erlotinib-DMSO)	0.609358	DDIT4
AGGTGGACGACGACGAGAAG	(Erlotinib-DMSO)	0.189014	DDIT4
GGAGTTCGGGGCAAGGACGA	(Erlotinib-DMSO)	0.0231107	DDIT4
GCGCAGGAGGGCTTCGGTCG	(Erlotinib-DMSO)	2.92045	DLK1
GGAACTCACCATAGGTGCTG	(Erlotinib-DMSO)	2.01759	DLK1
AGGTCACGCACTGGTCACAA	(Erlotinib-DMSO)	0.718244	DLK1
GCAGGAGCAAGAGGACGCGC	(Erlotinib-DMSO)	0.488719	DLK1
GTTCTCCACAGAGTCCGTGA	(Erlotinib-DMSO)	0.210635	DLK1
GCATATGAAGTGCTGTCGGA	(Erlotinib-DMSO)	3.51248	DNAJB6
CCGCATGCGCTCCTCAGCGA	(Erlotinib-DMSO)	3.24583	DNAJB6
CGACGACGATGCCCTCGCTG	(Erlotinib-DMSO)	-0.305069	DNAJB6
GCGTGTCTCAGCAGCGAGGC	(Erlotinib-DMSO)	-0.515477	DNAJB6
TCACTGTCTCTCTGAGGAGG	(Erlotinib-DMSO)	-1.51506	DNAJB6
GGTGTCCCCTATGAAACCGC	(Erlotinib-DMSO)	1.13028	DPP9
GGGAATCTCAGAGTAGAGGA	(Erlotinib-DMSO)	0.898722	DPP9
CCCGAGAGTAGACCCCATGG	(Erlotinib-DMSO)	0.865095	DPP9
GGCCAACATCGAGACAGGCG	(Erlotinib-DMSO)	0.77679	DPP9
TACCCAGGTAGTAGAGGCGG	(Erlotinib-DMSO)	-0.619863	DPP9
AATGATCTATGCAAGCTCCA	(Erlotinib-DMSO)	3.38361	DSTN
ATCAGCTACTTGCACTCCTG	(Erlotinib-DMSO)	2.47608	DSTN
ATGGACCAGAAGATCTCAAT	(Erlotinib-DMSO)	1.95518	DSTN
GAGATCTTGGTTGGAGATGT	(Erlotinib-DMSO)	0.824314	DSTN
AGAAGAAGGCAAAGAGATCT	(Erlotinib-DMSO)	-2.33966	DSTN
GTGCATGCATCAATGAGAAG	(Erlotinib-DMSO)	4.15792	EDDM3A
AATGCATATGTATGGGCCCC	(Erlotinib-DMSO)	3.23493	EDDM3A
TGTATACACACAGCCTGCAA	(Erlotinib-DMSO)	1.34597	EDDM3A
TATGCCCCAAATCTTTAGAG	(Erlotinib-DMSO)	-0.26138	EDDM3A
GCCTGCAAAGGATGCAAAGC	(Erlotinib-DMSO)	-1.19877	EDDM3A
GTGAGCTCGTGGGACGGCCG	(Erlotinib-DMSO)	1.8907	EIF4E2
TCAGAGCAGTAGCAAGAGAA	(Erlotinib-DMSO)	1.33794	EIF4E2
TGCAGGTGGAGCAGTTCTGG	(Erlotinib-DMSO)	1.32173	EIF4E2
CCAAGAACTCACAGAGGCAA	(Erlotinib-DMSO)	1.11607	EIF4E2
GGTCCCCAGGACGTACCATG	(Erlotinib-DMSO)	-0.102931	EIF4E2
GAAATAGAAAATCCCAGCCA	(Erlotinib-DMSO)	2.86694	EPHA4
GCAACGCTGGGCATGAGGAG	(Erlotinib-DMSO)	2.65314	EPHA4
GTTTCCTGACACCATCACAG	(Erlotinib-DMSO)	1.83994	EPHA4
GGAGCCTCGAACTTCCACCA	(Erlotinib-DMSO)	0.895217	EPHA4
GAGCGGAGCGGAGAATGCCA	(Erlotinib-DMSO)	-1.94689	EPHA4
GAGTAAAGAGCCTGCCGGCG	(Erlotinib-DMSO)	2.16317	ERI1
ACCTCGGGACTGGGACGCGG	(Erlotinib-DMSO)	1.51509	ERI1
ACAGTGTAAATTTGATGGCC	(Erlotinib-DMSO)	0.957011	ERI1
TCGCGCTGCTGGAGTCGCCG	(Erlotinib-DMSO)	0.135789	ERI1
TCGACTCCTCACCTCGGGAC	(Erlotinib-DMSO)	0.0580067	ERI1
TTTACCTCCAGGTAAACTCG	(Erlotinib-DMSO)	2.44209	ETS1
GTGATCGCCTCACCCAGTCC	(Erlotinib-DMSO)	2.43649	ETS1
CTATGCTTTCAAAAGAGTCC	(Erlotinib-DMSO)	2.20368	ETS1
CATAGGAGGGAACACGCTGC	(Erlotinib-DMSO)	1.76112	ETS1
GAGTCGAAGCTGTCATAGGA	(Erlotinib-DMSO)	0.921897	ETS1
GAAGAACATTGAGTCGTATG	(Erlotinib-DMSO)	4.11814	FAM49B
CCAGCATCTAGAGCGAGAGC	(Erlotinib-DMSO)	4.00293	FAM49B
CCAGCCTACAGAGTCTGAGA	(Erlotinib-DMSO)	3.73006	FAM49B
AGCTGGCCACGAAATACGAG	(Erlotinib-DMSO)	3.20672	FAM49B
GACATGCACAGACCTTGAGC	(Erlotinib-DMSO)	-1.14375	FAM49B
CGATCCGCGGCTGCACGAGG	(Erlotinib-DMSO)	1.92698	FAM84B
ATGTAGGAGACCCCAATGCG	(Erlotinib-DMSO)	1.88818	FAM84B
CAGCGTGATGGGCAACCAGG	(Erlotinib-DMSO)	1.6399	FAM84B
AAGTTACAAGGAAGTTCCCA	(Erlotinib-DMSO)	0.896992	FAM84B
CCATCTGGCCCCTGAGGCGG	(Erlotinib-DMSO)	-1.36846	FAM84B
GCAAGTCCATTCTCATCACG	(Erlotinib-DMSO)	2.96665	FAR2
CTGGCCAGACACTGCAGCAG	(Erlotinib-DMSO)	1.01824	FAR2
CACTTTGCCCAGAAAGCCTG	(Erlotinib-DMSO)	0.284217	FAR2
AATGACTTTCAGGTCTGGGC	(Erlotinib-DMSO)	0.0213576	FAR2
AGTGTCGTCAAAGCGTACAG	(Erlotinib-DMSO)	0.0156267	FAR2
GCTCATCATACTGCAGACAG	(Erlotinib-DMSO)	2.96743	FBXW11
GCTCTTCAGATTCTACGGTG	(Erlotinib-DMSO)	2.35006	FBXW11
AAAGTGTTAACAGGACACAC	(Erlotinib-DMSO)	1.68767	FBXW11
GTGGACGACACAACTTGCAG	(Erlotinib-DMSO)	0.798404	FBXW11
GGAGCCCGACTCGGTGATTG	(Erlotinib-DMSO)	0.460793	FBXW11
GGGGACCTCAGAGCAGCCAA	(Erlotinib-DMSO)	2.33527	FBXW7
GAGAGAGAAATGCAAAGAAG	(Erlotinib-DMSO)	1.74567	FBXW7
TGAACATGGTACAAGCCCAG	(Erlotinib-DMSO)	1.22416	FBXW7
ACATTAGTGGGACATACAGG	(Erlotinib-DMSO)	1.13352	FBXW7
ATGAAGTCTCGTTGAAACTG	(Erlotinib-DMSO)	0.575416	FBXW7
GCTTCTGCAGACAGTCAAGC	(Erlotinib-DMSO)	1.38592	FCGR2A
ATGTATGTCCCAGAAACCTG	(Erlotinib-DMSO)	0.767709	FCGR2A
TCTGTGACTCTGACATGCCA	(Erlotinib-DMSO)	0.592482	FCGR2A
TCAATGGTTGAAGCAGCCAC	(Erlotinib-DMSO)	0.541332	FCGR2A
CTGGAGCACGTTGATCCACG	(Erlotinib-DMSO)	-0.0104898	FCGR2A
CATTGATGGCACCAAAGATG	(Erlotinib-DMSO)	4.73933	FGF13
CTACCACTTGCAGCTGCAGG	(Erlotinib-DMSO)	3.3267	FGF13
TCTGTTTAACCTCATCCCTG	(Erlotinib-DMSO)	0.599945	FGF13
GTAACTATACCCTTAAGCTG	(Erlotinib-DMSO)	-0.834322	FGF13
CAGGCGGATGGAACCATTGA	(Erlotinib-DMSO)	-1.94273	FGF13
AGAGAGATTCGTTGCAATGG	(Erlotinib-DMSO)	1.75187	FHL2
CAAGAAGTACATCCTGCGGG	(Erlotinib-DMSO)	1.37881	FHL2
GCAGCGGTGGCAGATGAAGC	(Erlotinib-DMSO)	0.531493	FHL2
GCAGTGCAGAAACTCACTGG	(Erlotinib-DMSO)	0.520329	FHL2
GGGCTTCCCACACTCCTCGC	(Erlotinib-DMSO)	0.228747	FHL2
CTACTACGCAGACACGCAGG	(Erlotinib-DMSO)	2.88607	FOXA1
GTAGTAGCTGTTCCAGTCGC	(Erlotinib-DMSO)	2.20928	FOXA1
GTTCATGTTGCTGACCGGGA	(Erlotinib-DMSO)	1.98596	FOXA1
AAGGGCATGAAACCAGCGAC	(Erlotinib-DMSO)	1.42018	FOXA1
GATGTTAGGAACTGTGAAGA	(Erlotinib-DMSO)	0.639306	FOXA1
GATGCAGTTCACAGTGGTTG	(Erlotinib-DMSO)	2.44815	FSTL1
GAAGCTGAGATCATTCCAGA	(Erlotinib-DMSO)	2.1266	FSTL1
GAGGATGAAACGTATGCAGA	(Erlotinib-DMSO)	1.83469	FSTL1
GCCGGCTCCACAAAACACAT	(Erlotinib-DMSO)	0.880107	FSTL1
TGGCCCAACAGAGTGTGCCC	(Erlotinib-DMSO)	-1.76214	FSTL1
GAGGCCCTGGTTGCTATGGG	(Erlotinib-DMSO)	5.64158	FURIN
CATCCCTGGAGGCCCAGCGG	(Erlotinib-DMSO)	3.15188	FURIN
GATGCGCACAGCCCACGTGT	(Erlotinib-DMSO)	0.417515	FURIN
AGAAGGTCTTCACCAACACG	(Erlotinib-DMSO)	-0.11775	FURIN
GGTAGCAGCAACAGGAACCT	(Erlotinib-DMSO)	-2.75796	FURIN
GCTGCCAATATGGATACTGT	(Erlotinib-DMSO)	1.34072	GMPR2
ATCGTTGTCAATATGAGGCA	(Erlotinib-DMSO)	1.22741	GMPR2
GAAGTATATATGCCTGGATG	(Erlotinib-DMSO)	1.17479	GMPR2
TACTGTGGGCACCTTTGAGA	(Erlotinib-DMSO)	0.502413	GMPR2
TGAGCAGCTGGAACAGATCC	(Erlotinib-DMSO)	0.433597	GMPR2
GGGCTTCGGCAGCTGCCCTG	(Erlotinib-DMSO)	6.15604	GPRIN3
GGACCTGAAGGGGAAAGGCA	(Erlotinib-DMSO)	3.19766	GPRIN3
GCTGAGGTCTGGTTCTGCAG	(Erlotinib-DMSO)	0.387284	GPRIN3
ATTGGGCTGATCACCTGGGA	(Erlotinib-DMSO)	-1.50943	GPRIN3
AGGAGAGCTGGTCGATGCCG	(Erlotinib-DMSO)	-1.67911	GPRIN3
TCACACATACTGACATACTC	(Erlotinib-DMSO)	2.58685	HDAC8
CGGGACTATAGATATAAACC	(Erlotinib-DMSO)	2.1289	HDAC8
CCGGAGGAACCGGCGGACAG	(Erlotinib-DMSO)	0.728322	HDAC8
GCGGAAGATGGAGGAGCCGG	(Erlotinib-DMSO)	0.634168	HDAC8
AGCGACTGCCCACTGTCCGC	(Erlotinib-DMSO)	0.17148	HDAC8
GGTACAGGTGCCCAGTGGGG	(Erlotinib-DMSO)	2.69649	HECW2
GCAGGGCTCCACTAATGCCG	(Erlotinib-DMSO)	2.01905	HECW2
GGTTCTTCACGGTGATGCAG	(Erlotinib-DMSO)	1.64245	HECW2
GCAGCAGAGCCCACCAGCAG	(Erlotinib-DMSO)	1.23768	HECW2
GGAGCACCGTGTGTCCACAG	(Erlotinib-DMSO)	-0.180973	HECW2
GCCGGGCTTCAGTTTCCCGT	(Erlotinib-DMSO)	3.08848	HIST1H2AI
GTGCATCGCCTGCTCCGCAA	(Erlotinib-DMSO)	2.4275	HIST1H2AI
GCCGGGCTTCAGTTTCCCGT	(Erlotinib-DMSO)	2.05829	HIST1H2AI
GTGCATCGCCTGCTCCGCAA	(Erlotinib-DMSO)	1.95533	HIST1H2AI
GAAGCCCGGCCCGAGAAGAG	(Erlotinib-DMSO)	0.866326	HIST1H2AI
GGGAGGCAAAGCTCGCGCCA	(Erlotinib-DMSO)	-0.147151	HIST1H2AI
CTGCTTGCCACGCCCAGACA	(Erlotinib-DMSO)	-0.242615	HIST1H2AI
GAAGCCCGGCCCGAGAAGAG	(Erlotinib-DMSO)	-0.732893	HIST1H2AI
GGGAGGCAAAGCTCGCGCCA	(Erlotinib-DMSO)	-1.88988	HIST1H2AI
GCCGGGCTTCAGTTTCCCGT	(Erlotinib-DMSO)	3.08848	HIST1H2AJ
GTGCATCGCCTGCTCCGCAA	(Erlotinib-DMSO)	2.4275	HIST1H2AJ
GCCGGGCTTCAGTTTCCCGT	(Erlotinib-DMSO)	2.05829	HIST1H2AJ
GTGCATCGCCTGCTCCGCAA	(Erlotinib-DMSO)	1.95533	HIST1H2AJ
GAAGCCCGGCCCGAGAAGAG	(Erlotinib-DMSO)	0.866326	HIST1H2AJ
GGGAGGCAAAGCTCGCGCCA	(Erlotinib-DMSO)	-0.147151	HIST1H2AJ
GAAGCCCGGCCCGAGAAGAG	(Erlotinib-DMSO)	-0.732893	HIST1H2AJ
TCTGGGCGTGGTAAGCAGGG	(Erlotinib-DMSO)	-0.909293	HIST1H2AJ
GGGAGGCAAAGCTCGCGCCA	(Erlotinib-DMSO)	-1.88988	HIST1H2AJ
GCAGCCCAGGTGAACTCCGA	(Erlotinib-DMSO)	2.97577	HSPA14
GCAGCCCCTCACCTTATAGA	(Erlotinib-DMSO)	2.03205	HSPA14
ACAAGCTCAGAAATACATCG	(Erlotinib-DMSO)	1.44944	HSPA14
ATAGACGGCCACACAGGCTG	(Erlotinib-DMSO)	0.780495	HSPA14
GGTGTGGTTGCAAATGATGC	(Erlotinib-DMSO)	0.531154	HSPA14
ACACCTCTGAGGAGCTGCTG	(Erlotinib-DMSO)	3.21449	IL25
GAACCCACACCTACAGCCAC	(Erlotinib-DMSO)	1.52414	IL25
GGTGGTTGCATTCTTGGCAA	(Erlotinib-DMSO)	1.17686	IL25
GCAGCTGGGCCAGTGGCTGT	(Erlotinib-DMSO)	0.827242	IL25
CTGCTGCCCCAGCAAAGGGC	(Erlotinib-DMSO)	-0.515	IL25
AAGTGGGTCCGACTCAACGT	(Erlotinib-DMSO)	4.9043	KCTD5
ACAGGGTCTGCCGAGTGGTG	(Erlotinib-DMSO)	4.6041	KCTD5
AGGATTTCGGGTCCCGGCAC	(Erlotinib-DMSO)	3.98825	KCTD5
TGGACACGCTGCCAGGGCGC	(Erlotinib-DMSO)	3.6377	KCTD5
ACGAGACAGCAAAACATCGC	(Erlotinib-DMSO)	3.44016	KCTD5
AATCCTAACAATCCCTCAGG	(Erlotinib-DMSO)	2.08501	KCTD9
ACACCTAGAAGTGGCAATAA	(Erlotinib-DMSO)	1.61332	KCTD9
AAAATGGGTTCGAAGTACTC	(Erlotinib-DMSO)	0.893538	KCTD9
TAATGGTGACACAGGTGTCT	(Erlotinib-DMSO)	0.807716	KCTD9
GACAGATTCTAAGCCTCCTG	(Erlotinib-DMSO)	-0.851678	KCTD9
GCTGCGGGAGCAGGGCATGG	(Erlotinib-DMSO)	6.29543	KEAP1
CCAGTTCATGGCCCACAAGG	(Erlotinib-DMSO)	5.1167	KEAP1
AGTACGACTGCGAACAGCGA	(Erlotinib-DMSO)	4.64513	KEAP1
TGACCAGGTAGTCCTTGCAG	(Erlotinib-DMSO)	1.83128	KEAP1
GGCGCTCCATGACCTTGGGG	(Erlotinib-DMSO)	1.05469	KEAP1
GCTCTGGTTGACCGTAACTG	(Erlotinib-DMSO)	7.17854	KRT8
GGCAGCAGCAACTTTCGCGG	(Erlotinib-DMSO)	0.836553	KRT8
CGAGGAGCTGATGCGGGAAC	(Erlotinib-DMSO)	0.801611	KRT8
GGGAGGCATCACCGCAGTTA	(Erlotinib-DMSO)	-0.0107191	KRT8
CCTCACCTTGTCTATGAAGG	(Erlotinib-DMSO)	-1.98608	KRT8
GAGGATGACTCAGAGCAGGT	(Erlotinib-DMSO)	4.3797	KRTAP10-2
AGCTGCTGTGAGCTCCCCTG	(Erlotinib-DMSO)	3.76249	KRTAP10-2
GCAGCAGACAGGCACACGGC	(Erlotinib-DMSO)	1.54448	KRTAP10-2
GGGCTGGGGCACAGCAGCTG	(Erlotinib-DMSO)	-0.63425	KRTAP10-2
CCAGCGCCTGCACCAACTCC	(Erlotinib-DMSO)	-0.781652	KRTAP10-2
ATAGCTGCCATAGTAGCTCA	(Erlotinib-DMSO)	1.53922	KRTAP19-4
CCTGACGCCATGAGCTACTA	(Erlotinib-DMSO)	0.723718	KRTAP19-4
GGCAGCTATTACAGAGGCCT	(Erlotinib-DMSO)	0.562722	KRTAP19-4
CACAGCCATAGCCATAGCCT	(Erlotinib-DMSO)	0.363163	KRTAP19-4
GGCTTTGGTGGCCTAGGCTA	(Erlotinib-DMSO)	0.0294254	KRTAP19-4
GCTCTGGACGCCTCCAGTGT	(Erlotinib-DMSO)	1.7588	LAMTOR2
GCGCCCCAAGGCTTTGACCC	(Erlotinib-DMSO)	0.814668	LAMTOR2
GTGCTAAGCCAAGCCAACAC	(Erlotinib-DMSO)	0.271848	LAMTOR2
CGTAGGCATGCTGCGCCCCA	(Erlotinib-DMSO)	0.134311	LAMTOR2
TCTGCACTCACAGGGTGCTC	(Erlotinib-DMSO)	0.00590076	LAMTOR2
GGAACAGCAGGAGGTGATAG	(Erlotinib-DMSO)	1.91313	LCMT1
CCGACAGGCACCTCTTGCAC	(Erlotinib-DMSO)	1.7323	LCMT1
CGCCCATGGCCACTAGGCAG	(Erlotinib-DMSO)	1.4354	LCMT1
GAGCTGCGACGCAGACGACG	(Erlotinib-DMSO)	1.38067	LCMT1
GCAGCTCGAGGTGGAACAGC	(Erlotinib-DMSO)	-0.0526305	LCMT1
GCGCTACGGGCATACCATGG	(Erlotinib-DMSO)	2.69587	LZTR1
GGGGAAGTTGCAGCAAGATG	(Erlotinib-DMSO)	2.47468	LZTR1
CAGGCGCAGCAAGCACACAG	(Erlotinib-DMSO)	1.86274	LZTR1
CGAGCTGCACTGCTATGACG	(Erlotinib-DMSO)	1.44177	LZTR1
GTGGCGGTCAAAGGCCACCA	(Erlotinib-DMSO)	-0.820498	LZTR1
TCAACTTGGCAGCTTTTCGA	(Erlotinib-DMSO)	3.25573	MBNL1
AGTATGTAGAGAGTTCCAGA	(Erlotinib-DMSO)	2.56282	MBNL1
GGACACAAAATGGCTAACAC	(Erlotinib-DMSO)	2.09088	MBNL1
GACTTGCTCACGGCCAGACA	(Erlotinib-DMSO)	0.528783	MBNL1
GCAGAAGAACATGGCCATGT	(Erlotinib-DMSO)	-0.999566	MBNL1
CACCTGCTCTTATGGAACGG	(Erlotinib-DMSO)	2.01424	MDP1
CTGCGGTGCGGGTCATGGCG	(Erlotinib-DMSO)	1.30072	MDP1
GGAACTGTACGAGATAGGCG	(Erlotinib-DMSO)	1.08006	MDP1
AGACGTCCGACTGTACCCAG	(Erlotinib-DMSO)	0.0755687	MDP1
GAAGCTGGCAGTCTTTGATT	(Erlotinib-DMSO)	-0.0115243	MDP1
ACAGCTGCAGTAGCTCTAGC	(Erlotinib-DMSO)	3.11943	ME2
GTTCCCACATCAATACACAC	(Erlotinib-DMSO)	2.97476	ME2
TGTTTGTATACAGCTTGTGC	(Erlotinib-DMSO)	1.98453	ME2
GGTGGAAACTACTCTTAACC	(Erlotinib-DMSO)	0.331022	ME2
GATGTGTCCATACTGGGAGC	(Erlotinib-DMSO)	-0.45117	ME2
CGGCGGCGGCAACATCGTGG	(Erlotinib-DMSO)	2.96434	MED16
CAGCCGGCACAGGCTCTCGG	(Erlotinib-DMSO)	2.86892	MED16
GATCCCCTCAGAGCACCACG	(Erlotinib-DMSO)	2.22972	MED16
GGAGGGCTGGATCGCGGTGA	(Erlotinib-DMSO)	1.40966	MED16
GGATCGAGTGCAGGTCCCAG	(Erlotinib-DMSO)	-0.719761	MED16
GGAGCTCATACTTGCAGCGC	(Erlotinib-DMSO)	4.93393	MED24
TGACAGTGGGCTCCGCCCGG	(Erlotinib-DMSO)	3.95717	MED24
TGCAAGCCTGGAAGGAGCGC	(Erlotinib-DMSO)	2.38017	MED24
TAGCTGTCACGGCAAAGCAG	(Erlotinib-DMSO)	1.07397	MED24
GGGGCTCATTGAGTCTCCCG	(Erlotinib-DMSO)	-0.610248	MED24
AAATTCGTTGATCTCTGCCC	(Erlotinib-DMSO)	1.75168	MIPOL1
GGGATAGCTATTCAGAAGAA	(Erlotinib-DMSO)	1.66983	MIPOL1
AATTGCACGAGCCAAGCATA	(Erlotinib-DMSO)	1.27039	MIPOL1
TGTGAGAACACAGAATGGCC	(Erlotinib-DMSO)	0.799	MIPOL1
GAGTCTGAAGTAACTTGACA	(Erlotinib-DMSO)	-0.611265	MIPOL1
ACATTGGATGTTGCACGCTG	(Erlotinib-DMSO)	2.46161	MYL12B
GTCAAACATGGCAAACACAT	(Erlotinib-DMSO)	1.8954	MYL12B
ACGCTGAGGGCGCTTCTTGG	(Erlotinib-DMSO)	1.41376	MYL12B
CAGAGATGGCTTCATCGACA	(Erlotinib-DMSO)	1.36724	MYL12B
GGCATCAAGGTATGCATCAG	(Erlotinib-DMSO)	-0.187492	MYL12B
GCGGTTCTTACTGTCACCCA	(Erlotinib-DMSO)	2.38525	MYOCD
GCTTCCCCGCATCTGACTGG	(Erlotinib-DMSO)	1.55663	MYOCD
GGATGGGCTGGACTCCGAGA	(Erlotinib-DMSO)	1.04629	MYOCD
GGACAGGGCACTGGTAGAAG	(Erlotinib-DMSO)	0.816842	MYOCD
GAAGAGGACAGCAGCAGCGA	(Erlotinib-DMSO)	-1.17346	MYOCD
GAGACTGGCCAGACACCTGA	(Erlotinib-DMSO)	1.4942	NEUROD4
GGGCTCCCAAAATGAGGTGA	(Erlotinib-DMSO)	1.1326	NEUROD4
ATGGGGAGAAACCTAAGAGA	(Erlotinib-DMSO)	1.11635	NEUROD4
ATGACGCCCTGGATAACCTG	(Erlotinib-DMSO)	1.09663	NEUROD4
GCATGGCCTGAATGACGCCC	(Erlotinib-DMSO)	-0.62685	NEUROD4
CCAGGATATATCCAAAGACG	(Erlotinib-DMSO)	3.21628	NF1
GGTCAGCCGCTTCGACGAGC	(Erlotinib-DMSO)	2.79328	NF1
AGTCAGTACTGAGCACAACA	(Erlotinib-DMSO)	2.28075	NF1
ACGGCCTGGACCCATTCCAC	(Erlotinib-DMSO)	2.2288	NF1
GAGAGAAAATAAAACCCCAG	(Erlotinib-DMSO)	1.85998	NF1
CACCGTGAGGATCGTCACCA	(Erlotinib-DMSO)	4.67662	NF2
AACCCAAGACGTTCACCGTG	(Erlotinib-DMSO)	4.13083	NF2
TGAGAGAGCTGAAGCTCATG	(Erlotinib-DMSO)	3.22906	NF2
GGAAGCGATGGCCCCGGCCA	(Erlotinib-DMSO)	0.734203	NF2
GAAGCTCATGCGGGAAGCGA	(Erlotinib-DMSO)	0.197887	NF2
AGAGTGACGCGTCCCAGAGT	(Erlotinib-DMSO)	3.00511	NIPAL4
GAGTGGGAGAGTCCCCGGGG	(Erlotinib-DMSO)	2.81173	NIPAL4
GGGGCACACGAACCGACGCG	(Erlotinib-DMSO)	1.95282	NIPAL4
CTTGGGAGGAGCAGTAGAGG	(Erlotinib-DMSO)	-0.611975	NIPAL4
GGCCACCTGCTCCGGAGCTG	(Erlotinib-DMSO)	-2.10593	NIPAL4
TGACATCTTGAGTCCCCTGG	(Erlotinib-DMSO)	2.64764	NKX2-1
GGAGGAAAGCTACAAGAAAG	(Erlotinib-DMSO)	1.91539	NKX2-1
CCAGGCGGCACCGCCAACAG	(Erlotinib-DMSO)	1.68933	NKX2-1
AAAGTGGGCATGGAGGGCGG	(Erlotinib-DMSO)	1.44724	NKX2-1
GGCGTACAGGCAGGGCCAGG	(Erlotinib-DMSO)	-1.04475	NKX2-1
GCAGCGCGGAGCGCCAGAAG	(Erlotinib-DMSO)	4.90372	NME4
CTGGTGGCGGTGAAGCCCGA	(Erlotinib-DMSO)	2.74847	NME4
AGCCCGATGGCGTGCAACGG	(Erlotinib-DMSO)	1.92471	NME4
TGAGAGGCGGGGCTTCACGC	(Erlotinib-DMSO)	-0.151475	NME4
GCACTAGCAGGCTCGGGCCC	(Erlotinib-DMSO)	-2.69447	NME4
CTCGAAGCCATGGCGGGACC	(Erlotinib-DMSO)	1.30243	NRK
CAGGTCCCGCCATGGCTTCG	(Erlotinib-DMSO)	0.96451	NRK
TCGAGGAGCCGAACGGGAGC	(Erlotinib-DMSO)	0.742335	NRK
CGCCTTCCTATTTCAGGTAA	(Erlotinib-DMSO)	0.459924	NRK
CGTTCGGCTCCTCGAAGCCA	(Erlotinib-DMSO)	0.15247	NRK
GGAAGCCAAAGAGAACGCGC	(Erlotinib-DMSO)	2.65945	NUDCD3
AGGCGACATGGAGACAGGGG	(Erlotinib-DMSO)	1.41482	NUDCD3
GGATGATGAGAAGAGAAGGC	(Erlotinib-DMSO)	0.301454	NUDCD3
GCAGCCTCCAGGCCCTGTGA	(Erlotinib-DMSO)	0.258209	NUDCD3
GGGAAGCCCATGCGGTCCGA	(Erlotinib-DMSO)	0.019609	NUDCD3
GGTAGTCAGTGCCCAGCCTG	(Erlotinib-DMSO)	4.94026	NUTM2D
TTCCACAATGAGAAAAGCCA	(Erlotinib-DMSO)	1.82448	NUTM2D
TTGTGGAAACTGCCAGACAG	(Erlotinib-DMSO)	1.0243	NUTM2D
GGGAAGTTAGACAGCACCAG	(Erlotinib-DMSO)	0.814491	NUTM2D
CTCCACAGCATACCCAGCGC	(Erlotinib-DMSO)	-1.50098	NUTM2D
GGAGCACATCCCCGAGGCAG	(Erlotinib-DMSO)	4.18264	PACS2
CCAGTGACGACGCCGTGCAG	(Erlotinib-DMSO)	1.13694	PACS2
AAGTGGTAGCGCTGCTGCGG	(Erlotinib-DMSO)	0.757552	PACS2
CGACAGTGTCTCTGACACGG	(Erlotinib-DMSO)	0.302363	PACS2
TGGGGAAGCCGAAGAAGCAG	(Erlotinib-DMSO)	-0.0138468	PACS2
AGGCAATCTCAACAAGGCCA	(Erlotinib-DMSO)	2.12302	PARP2
AATGGGACAGCACAGCCTGG	(Erlotinib-DMSO)	1.74455	PARP2
ACAAAGCCCAGAACACCCAT	(Erlotinib-DMSO)	1.36389	PARP2
CGAATTCCATGGCGGCGCGG	(Erlotinib-DMSO)	0.321673	PARP2
GTGTACAGCCAAGGTGGGGA	(Erlotinib-DMSO)	0.0325271	PARP2
TGAGCGAGCGGACTTCGCCC	(Erlotinib-DMSO)	5.8394	PC
CAGGCGCCGGACATTTGGGG	(Erlotinib-DMSO)	3.93262	PC
CAAGATGGGAGACAAGGTGG	(Erlotinib-DMSO)	0.320523	PC
GCAGGCCCGGAACACACGGA	(Erlotinib-DMSO)	-1.41253	PC
GAAGATGATGGGGAAGCCGT	(Erlotinib-DMSO)	-2.44031	PC
ACTGCTTGAAGATGGCATCA	(Erlotinib-DMSO)	8.24989	PCBD1
GCTGCCAAACCTGAGGGCTG	(Erlotinib-DMSO)	1.71865	PCBD1
TCTAGGCTGGCAAAGCACAC	(Erlotinib-DMSO)	0.543354	PCBD1
GTGGGGTGGAATGAGCTGGA	(Erlotinib-DMSO)	-0.803823	PCBD1
AGCACACAGGCTGAGCGCTG	(Erlotinib-DMSO)	-1.10049	PCBD1
GACACCGGTGTGATTGAAGG	(Erlotinib-DMSO)	3.04454	PCBP2
AGTTAAGAAGATGCGCGAGG	(Erlotinib-DMSO)	3.01902	PCBP2
CAAGATCAAGGAAATACGAG	(Erlotinib-DMSO)	2.90531	PCBP2
ACACTGCTCGACATGGACAC	(Erlotinib-DMSO)	0.614858	PCBP2
AGTTGGCAGTATCATCGGAA	(Erlotinib-DMSO)	-0.513462	PCBP2
GAGTGTGTCCGCCTATGAGC	(Erlotinib-DMSO)	1.0065	PCDHA7
GCAGCTTGGGAGGCAGGGAG	(Erlotinib-DMSO)	0.991853	PCDHA7
AGGGAAGTGAGAGTCAACTG	(Erlotinib-DMSO)	0.925221	PCDHA7
GTGTCGCTGGGAACACCGGA	(Erlotinib-DMSO)	0.839036	PCDHA7
GTATGAGTTGCAACCGGTGG	(Erlotinib-DMSO)	0.636249	PCDHA7
CAACTCACCTCATTAAACAC	(Erlotinib-DMSO)	4.49459	PDCD10
ACTGAGAGCCGCTTTCATCA	(Erlotinib-DMSO)	3.44421	PDCD10
TGAAGCTGAGACCACATCCA	(Erlotinib-DMSO)	2.97898	PDCD10
GGATACATGACTGCATAGAG	(Erlotinib-DMSO)	2.74507	PDCD10
ATAGAGGGGCATAGAAACCA	(Erlotinib-DMSO)	2.71101	PDCD10
GAACCAATCCCACTGAAGGG	(Erlotinib-DMSO)	4.60678	PDK3
CATGCGGAAAGAGATGCGGT	(Erlotinib-DMSO)	3.3261	PDK3
TAAGAGCCCTGAGGATCCAC	(Erlotinib-DMSO)	0.668712	PDK3
TGTTTGATGGAGAGCGGCGA	(Erlotinib-DMSO)	0.101885	PDK3
GAGAGAAGTTAATCTTCTGC	(Erlotinib-DMSO)	-1.631	PDK3
TGTGCCAGAAACCGCAAAGG	(Erlotinib-DMSO)	2.84501	PEX6
AGCAGTGCCCAACCTAGCGC	(Erlotinib-DMSO)	2.51532	PEX6
AGGGCTGCCACCAGCAGCGC	(Erlotinib-DMSO)	2.29851	PEX6
GCAAAGGAGGACACCACGGG	(Erlotinib-DMSO)	-1.02705	PEX6
CGGCTAACCAGTAGCTGCGG	(Erlotinib-DMSO)	-1.12736	PEX6
GGCAGGACGGGGAGTAGTAG	(Erlotinib-DMSO)	3.58554	PIGH
GCAGAATTCCCGGCAGGACG	(Erlotinib-DMSO)	2.85699	PIGH
AGCGAACGCAGCGAGAGCCG	(Erlotinib-DMSO)	1.80553	PIGH
GCGAGAGCCGAGGGCAGCTG	(Erlotinib-DMSO)	0.253462	PIGH
GGGGCGTCATGGAGGATGAG	(Erlotinib-DMSO)	-0.638241	PIGH
CAACTGCACCAGCACCACGG	(Erlotinib-DMSO)	1.69449	PIP4K2B
GAAGGTTTCGGAACACCATG	(Erlotinib-DMSO)	1.43239	PIP4K2B
CAGTCTTGATGACAAAGCGC	(Erlotinib-DMSO)	0.692246	PIP4K2B
TGGTGTGGAAACCTACATGG	(Erlotinib-DMSO)	0.679907	PIP4K2B
TGTGTCCAGCGAGGACGTGG	(Erlotinib-DMSO)	0.209846	PIP4K2B
GGCAATGGCGGAGAGGCCCG	(Erlotinib-DMSO)	1.78431	POLE3
TGGTGATCACGGCATTGGGC	(Erlotinib-DMSO)	1.37956	POLE3
GTCTCCTCGCAGCTCCCGGA	(Erlotinib-DMSO)	1.09736	POLE3
GGACGGTGTCAACATCTCCA	(Erlotinib-DMSO)	0.396922	POLE3
GATCACCAGGATCATCAAGG	(Erlotinib-DMSO)	-0.00850586	POLE3
TCTTCATAGCAGAATCGTCG	(Erlotinib-DMSO)	4.06063	POTEG
GCAAGAGCAAAGTGGGCCCT	(Erlotinib-DMSO)	2.18046	POTEG
GGGGAGCAGCAAGAGCAACG	(Erlotinib-DMSO)	2.15616	POTEG
AAATGGCTTCTTCACAGAGG	(Erlotinib-DMSO)	0.835006	POTEG
ATTTGGTCTCAGAAGCAAGA	(Erlotinib-DMSO)	0.793313	POTEG
GGCTAAGCAGCATGCAAGGC	(Erlotinib-DMSO)	2.15149	PPM1A
GCAACCCATTACCCTGCCCC	(Erlotinib-DMSO)	1.97273	PPM1A
GCTGTGATCGGTTTGCCAAG	(Erlotinib-DMSO)	1.82687	PPM1A
AGGCTGGCGTGTTGAAATGG	(Erlotinib-DMSO)	1.63257	PPM1A
TGGAAAAGCATAATGCCCAG	(Erlotinib-DMSO)	1.58873	PPM1A
GCAGTTTATGATGGTCATGC	(Erlotinib-DMSO)	3.26945	PPM1B
TTCAGACCTCAGAAACGGGA	(Erlotinib-DMSO)	1.63385	PPM1B
AAACATAATGCTCATGGTGC	(Erlotinib-DMSO)	1.29717	PPM1B
GCAAGGATGGAGAGTGGAAA	(Erlotinib-DMSO)	0.978003	PPM1B
GCCTGAGCAGCATGCAAGGA	(Erlotinib-DMSO)	0.682538	PPM1B
CAGGCCTGCCAAGTCGACAG	(Erlotinib-DMSO)	1.16631	PPP1R13B
GAAAGAACGAGTTGAAGCCC	(Erlotinib-DMSO)	0.875647	PPP1R13B
AAATAAGCGCAACATGGAGG	(Erlotinib-DMSO)	0.797287	PPP1R13B
CAAATTGACGGGACCAGCGG	(Erlotinib-DMSO)	0.0829498	PPP1R13B
GCAGCTGCTTGCCTACACCC	(Erlotinib-DMSO)	-0.0164081	PPP1R13B
TTAAGAAAATCTCTCTCCCG	(Erlotinib-DMSO)	1.69239	PPP2R5C
GAGCCCGATACCTGTAGATG	(Erlotinib-DMSO)	1.6743	PPP2R5C
GGCCAGGCTGCTTCTAACGT	(Erlotinib-DMSO)	1.09083	PPP2R5C
AGCTTCTCTTGATCAGCAGG	(Erlotinib-DMSO)	0.857971	PPP2R5C
GGGAGCGGAATTTGACCCGG	(Erlotinib-DMSO)	-0.866284	PPP2R5C
GGAGGACCAAATATCGGAGG	(Erlotinib-DMSO)	2.37285	PRR32
GCTATTCGTGTATTTCCGGG	(Erlotinib-DMSO)	2.31793	PRR32
GCAAAATAAGAAGGCAGTGG	(Erlotinib-DMSO)	2.2488	PRR32
GTGTCCTGGGAAGTCTCTGG	(Erlotinib-DMSO)	-0.100858	PRR32
AGAGAGGCAGTAATAACGCA	(Erlotinib-DMSO)	-0.382364	PRR32
TACAAATCACTTACTCGAGC	(Erlotinib-DMSO)	1.04579	PSIP1
CTACTCCAAAAGCTGCCAGA	(Erlotinib-DMSO)	0.612859	PSIP1
AGATGAAAGGTTATCCCCAT	(Erlotinib-DMSO)	0.610373	PSIP1
CCTAAAAGAGGACGACCTGC	(Erlotinib-DMSO)	0.605506	PSIP1
TAGGTAGACGAAGTTCCTGA	(Erlotinib-DMSO)	0.217594	PSIP1
GGTTTGATAAGTTCTAGCTG	(Erlotinib-DMSO)	6.90117	PTEN
AAAGCTGGAAAGGGACGAAC	(Erlotinib-DMSO)	5.31522	PTEN
GCAGCAATTCACTGTAAAGC	(Erlotinib-DMSO)	5.31149	PTEN
ACCGCCAAATTTAATTGCAG	(Erlotinib-DMSO)	4.05274	PTEN
GCTAACGATCTCTTTGATGA	(Erlotinib-DMSO)	3.40567	PTEN
GGATTTCAAGATCCGGACCG	(Erlotinib-DMSO)	0.936458	RAB35
CTGCTCATCATCGGCGACAG	(Erlotinib-DMSO)	0.875479	RAB35
TGATGAGCAGCTTGAAGAGG	(Erlotinib-DMSO)	0.475469	RAB35
CTACATCACCACGATCGGAG	(Erlotinib-DMSO)	0.219804	RAB35
GAAGAGGTGGTCGTAGTCCC	(Erlotinib-DMSO)	0.131498	RAB35
AATTCGGCCTCGAGATCTGG	(Erlotinib-DMSO)	2.13392	RBM23
GCACACGATCCTCACGACGA	(Erlotinib-DMSO)	2.11519	RBM23
GATTTCACAGAATTCCACGT	(Erlotinib-DMSO)	1.70491	RBM23
ACCAGCAGCACCAGCAACAG	(Erlotinib-DMSO)	0.777623	RBM23
AACAGTGGCAATGAGACCAG	(Erlotinib-DMSO)	-0.0800967	RBM23
GATGCCGGCAGGAAAAGACC	(Erlotinib-DMSO)	3.76522	REXO4
GGTTTTGGAAAAGCAAGGCG	(Erlotinib-DMSO)	3.47251	REXO4
GGGACATCGAGCATAAGAAG	(Erlotinib-DMSO)	0.618047	REXO4
GTACCTCGCACCAAGGCCAG	(Erlotinib-DMSO)	-0.471083	REXO4
GAGGTCGCACCACAGCACCG	(Erlotinib-DMSO)	-1.55321	REXO4
GGGCCACATTCGCCATGCGG	(Erlotinib-DMSO)	4.66336	RGAG4
GCAAGGAATTAACCTCGGCC	(Erlotinib-DMSO)	3.13951	RGAG4
GCACTATGGGTACTGGCCAG	(Erlotinib-DMSO)	0.0447807	RGAG4
CATAGTGCCCGTCCTTGCGG	(Erlotinib-DMSO)	-0.248154	RGAG4
GGGCATTTAATTCTTCGCGC	(Erlotinib-DMSO)	-1.05463	RGAG4
GGGAACCACACACCTGCCGC	(Erlotinib-DMSO)	2.15309	RHPN1
GAGCTGGAGGAGCTCAGCGG	(Erlotinib-DMSO)	2.13836	RHPN1
GGAAGGCCTCCATAGCGCGG	(Erlotinib-DMSO)	1.92121	RHPN1
TGAGCTGCTCCAGTGCGCAG	(Erlotinib-DMSO)	-1.13149	RHPN1
GAGCCCGAGGCTCCTGGCAG	(Erlotinib-DMSO)	-1.44596	RHPN1
GCAGCTGCAAGCCAACGCAG	(Erlotinib-DMSO)	1.89585	RIN1
GGAGCTGCAGCGGGAGGAGA	(Erlotinib-DMSO)	1.38926	RIN1
GACGTGCCCAATGCCAGCGG	(Erlotinib-DMSO)	1.38189	RIN1
GTAGTGGCTGGAGACGAAGG	(Erlotinib-DMSO)	1.05394	RIN1
GCAGCTGCAGCCACACGGGC	(Erlotinib-DMSO)	-1.57917	RIN1
GCCTGGGTTCGACGATGAGG	(Erlotinib-DMSO)	3.20991	RNF19B
GACCCTAAGTGCCGCAGCGG	(Erlotinib-DMSO)	2.00316	RNF19B
GGCAGCCGCACCAGGCACAG	(Erlotinib-DMSO)	1.82974	RNF19B
GCGGACAGCTGAGGAGGCGC	(Erlotinib-DMSO)	0.5154	RNF19B
GACGATGAGGAGGCGGCGGA	(Erlotinib-DMSO)	-1.90031	RNF19B
CCTCAAGAAGTGGAACGCGG	(Erlotinib-DMSO)	5.65026	RNF7
AGATGTTCTCCCTCAAGAAG	(Erlotinib-DMSO)	5.07881	RNF7
CGGAGAGGAAACCTGCGCCC	(Erlotinib-DMSO)	2.14723	RNF7
CGGGAGCTCAGGCTCCAAGT	(Erlotinib-DMSO)	1.19788	RNF7
GGAGTGAGAGGCCAGGGCGC	(Erlotinib-DMSO)	-1.35482	RNF7
ACGACTTGGGAGAAATGGGG	(Erlotinib-DMSO)	1.89139	ROCK2
GTAATGGAGTACATGCCTGG	(Erlotinib-DMSO)	1.21892	ROCK2
GCGCCGGGCATTTTCCCCGT	(Erlotinib-DMSO)	1.16021	ROCK2
GAGCCGCCAGAGGAAGCTGG	(Erlotinib-DMSO)	0.919041	ROCK2
AGCAAAGGAGCTAGAAGAGG	(Erlotinib-DMSO)	0.462703	ROCK2
CTGTGGACTGGACAATGAGA	(Erlotinib-DMSO)	1.3902	SAV1
GAGCGAGAAGGACTTCCTCC	(Erlotinib-DMSO)	1.36327	SAV1
CCACAGACCAGCCAGGAGGA	(Erlotinib-DMSO)	1.29523	SAV1
TGACACTCACTCCGAAGCAG	(Erlotinib-DMSO)	0.997763	SAV1
GAAGATTTACCCCTTCCTCC	(Erlotinib-DMSO)	-0.923224	SAV1
CAGAGGCCACGAAGTGACGT	(Erlotinib-DMSO)	3.1062	SDR39U1
AGGATGAGCTCGCTGCATCG	(Erlotinib-DMSO)	1.04623	SDR39U1
CTCTCCGGCCAGGTTGACGG	(Erlotinib-DMSO)	0.524961	SDR39U1
CGTTGGTCTCCCGAAAGCCC	(Erlotinib-DMSO)	0.397662	SDR39U1
ACCCAGCTGCTGAATGCCAG	(Erlotinib-DMSO)	0.0532062	SDR39U1
GGTAGACCAATAAACTCCAG	(Erlotinib-DMSO)	3.26292	SENP8
GCAGTCATGAAACTGACTGT	(Erlotinib-DMSO)	3.14108	SENP8
ATACAACTCTCTTGTTGGGG	(Erlotinib-DMSO)	0.76598	SENP8
AACTCCAACCAGGCAGCTGG	(Erlotinib-DMSO)	0.289447	SENP8
GTTACATGGACAGTCTACTG	(Erlotinib-DMSO)	-0.502516	SENP8
AGAGGAGACGCAGCCGCCCG	(Erlotinib-DMSO)	2.24345	SERBP1
TCGAATCTTCGTTCACGAGG	(Erlotinib-DMSO)	2.06871	SERBP1
TGCTGCCTTCAGCACCTCGA	(Erlotinib-DMSO)	2.04646	SERBP1
ACCTTCTTTCTTAAGCGCCA	(Erlotinib-DMSO)	1.52899	SERBP1
CAAGAGCGCAGCTCAGGCCG	(Erlotinib-DMSO)	1.1675	SERBP1
GGACGAGGACGAGGACGCGG	(Erlotinib-DMSO)	2.29491	SHB
AGAGGCTGAGAAGCAGGAGG	(Erlotinib-DMSO)	1.32625	SHB
GTAGAGATGCGGAGAGCCGG	(Erlotinib-DMSO)	1.04633	SHB
GGCCAGACTACCGCGAGCAG	(Erlotinib-DMSO)	0.302882	SHB
GGAGGCGCAGCAACAGCCCG	(Erlotinib-DMSO)	0.0154655	SHB
GAACACCACGCTGCTGCTGG	(Erlotinib-DMSO)	3.86219	SLC13A4
GTAAAGGAAGGCCGGCACCA	(Erlotinib-DMSO)	3.54171	SLC13A4
TGAGGACGAGCAGCTCGTGG	(Erlotinib-DMSO)	0.616938	SLC13A4
GTCTAACCTCATTGGACCGG	(Erlotinib-DMSO)	-0.633158	SLC13A4
GATGGGCATCACCATGGCGG	(Erlotinib-DMSO)	-2.21004	SLC13A4
GGACACTCAGCAAATTACAG	(Erlotinib-DMSO)	9.49134	SLC35A1
GGAACCATGGCTGCCCCGAG	(Erlotinib-DMSO)	1.14972	SLC35A1
TGAACAGCATACACTAACGA	(Erlotinib-DMSO)	0.343732	SLC35A1
AAATGTCTTGGGGAGCCCCA	(Erlotinib-DMSO)	-0.169661	SLC35A1
GACCCAGTTCTCACCTCTCG	(Erlotinib-DMSO)	-2.21604	SLC35A1
GACACTCACTTCTGAAAAGA	(Erlotinib-DMSO)	4.12491	SLC35A5
GTGACTGAAAACTCTGGCTG	(Erlotinib-DMSO)	1.7633	SLC35A5
GGCGTCTAAACTGGATCCAG	(Erlotinib-DMSO)	1.45958	SLC35A5
GTGCTGTAAAGTTTTAGTCC	(Erlotinib-DMSO)	0.556454	SLC35A5
CAGCACAACTTGGCAGGACG	(Erlotinib-DMSO)	-0.00732721	SLC35A5
GCCAGGCCGCAGCTATGGGG	(Erlotinib-DMSO)	5.6482	SLC4A2
GAAGATTCCTGAGAATGCCG	(Erlotinib-DMSO)	2.21719	SLC4A2
CAGGAGGCCGGGTCTCGTGG	(Erlotinib-DMSO)	2.10707	SLC4A2
GGATGAGGCCAGCGAGGCTG	(Erlotinib-DMSO)	0.517853	SLC4A2
ACAGTGGGTGATGGATGTGG	(Erlotinib-DMSO)	0.468874	SLC4A2
ATACACAAGGATCCAGGCGA	(Erlotinib-DMSO)	3.11758	SLC6A1
TGTCCTTGCAGACACTGCCG	(Erlotinib-DMSO)	1.09086	SLC6A1
CGACGGGCAGATCTCCACCG	(Erlotinib-DMSO)	0.169428	SLC6A1
GCATCAGATGACGGACGGGC	(Erlotinib-DMSO)	0.147254	SLC6A1
CCAGAACTCCACCACAGCGC	(Erlotinib-DMSO)	0.129202	SLC6A1
GGCCCCATCACCCAAAGGGG	(Erlotinib-DMSO)	2.54909	SLC7A7
GGAGCAGGTGAAGCTGAAGA	(Erlotinib-DMSO)	2.16842	SLC7A7
TGATGGGGCCAGCCCAGGGC	(Erlotinib-DMSO)	1.32098	SLC7A7
GGGCCCCAAAGACGGAGAAG	(Erlotinib-DMSO)	1.02496	SLC7A7
GATGACCAGAGAGAGACCAA	(Erlotinib-DMSO)	-1.98393	SLC7A7
GGAGTGCTGGTCCATGGGGC	(Erlotinib-DMSO)	3.51483	SMARCA4
GGGGTCAGCACCATCCAGCG	(Erlotinib-DMSO)	2.75911	SMARCA4
GCCTTGGGGCAGCAGAACCG	(Erlotinib-DMSO)	1.39543	SMARCA4
GGCATGCTCAGAGCCACCCA	(Erlotinib-DMSO)	0.750901	SMARCA4
GACACCCCATCCCCACCCAG	(Erlotinib-DMSO)	0.299859	SMARCA4
TACTCAGGTACACATGACCG	(Erlotinib-DMSO)	3.32444	SMG7
AGGTCCACTCACCATTGGAG	(Erlotinib-DMSO)	2.2432	SMG7
GAGACCTTGACTGCTGGAAG	(Erlotinib-DMSO)	1.11477	SMG7
TAGGAACAGGAGCTAGACTG	(Erlotinib-DMSO)	0.600568	SMG7
GAGATGAGGTGAAAACCAAG	(Erlotinib-DMSO)	0.565575	SMG7
GCAGCAGCAAAGTCACGGGG	(Erlotinib-DMSO)	2.76851	SMLR1
GCCAACCACACAGACCCCAC	(Erlotinib-DMSO)	2.0026	SMLR1
TCCTGAAGTAGGCGATGAGG	(Erlotinib-DMSO)	1.12281	SMLR1
CAAAGAACAGGAACCAGCCA	(Erlotinib-DMSO)	1.00382	SMLR1
GTGACTCCCATGGTCCCCGT	(Erlotinib-DMSO)	-1.6506	SMLR1
GAAGCAGAAGCCCTTCTCGA	(Erlotinib-DMSO)	7.24721	SOCS5
GAAGTCGCTCTCTAAGACAG	(Erlotinib-DMSO)	1.60252	SOCS5
ACAGAGGTTGCAGGATACTG	(Erlotinib-DMSO)	0.843363	SOCS5
AATCTCTTCGGTCATGAGGG	(Erlotinib-DMSO)	-0.346602	SOCS5
GTATGTATTTGTGCATTGGG	(Erlotinib-DMSO)	-0.94158	SOCS5
CGTCCCCTGTGATTCCAACG	(Erlotinib-DMSO)	2.44083	SPANXA1
GACAAACAATCCAGTGCCGG	(Erlotinib-DMSO)	1.80763	SPANXA1
TGGCCTCGTTGGAATCACAG	(Erlotinib-DMSO)	0.429968	SPANXA1
CCAGTGCCGGCGGGGTGAAG	(Erlotinib-DMSO)	0.408285	SPANXA1
GACGCTCCTCTTCACCCCGC	(Erlotinib-DMSO)	0.389854	SPANXA1
CGTCCCCTGTGATTCCAACG	(Erlotinib-DMSO)	2.44083	SPANXA2
GACAAACAATCCAGTGCCGG	(Erlotinib-DMSO)	1.80763	SPANXA2
TGGCCTCGTTGGAATCACAG	(Erlotinib-DMSO)	0.429968	SPANXA2
CCAGTGCCGGCGGGGTGAAG	(Erlotinib-DMSO)	0.408285	SPANXA2
GACGCTCCTCTTCACCCCGC	(Erlotinib-DMSO)	0.389854	SPANXA2
TGGCCAGGAGGAGAGCGCAG	(Erlotinib-DMSO)	4.18772	SPON2
GCAGACGTCGGCGGAGCTGG	(Erlotinib-DMSO)	3.78672	SPON2
GCTCCGACTACAGCATGTGG	(Erlotinib-DMSO)	1.04996	SPON2
GACAGCCTGGACCTGTGCGA	(Erlotinib-DMSO)	-1.5106	SPON2
GCTGATGAAGGAGATCGAGG	(Erlotinib-DMSO)	-2.39248	SPON2
GATGCCCGAGCCTTTGACAG	(Erlotinib-DMSO)	3.36277	SPRED2
TGTAAGGTCATGCACCCCGA	(Erlotinib-DMSO)	1.06095	SPRED2
GACCAGAGATGACTCCAGCG	(Erlotinib-DMSO)	0.889486	SPRED2
GGAGGCGGGATCAGTCGCGT	(Erlotinib-DMSO)	0.876204	SPRED2
GGATGGTTCCCACAGGAAGG	(Erlotinib-DMSO)	0.0356451	SPRED2
GCTGGAGCCTAGGAGGCTGG	(Erlotinib-DMSO)	4.45928	SPRY2
AAACACCAATGAGTACACAG	(Erlotinib-DMSO)	3.57264	SPRY2
ATGGAGGCCAGAGCTCAGAG	(Erlotinib-DMSO)	2.58784	SPRY2
GTGACGGTGGCAGACAGCGT	(Erlotinib-DMSO)	2.13676	SPRY2
GGCGGTGCTCAGGCAGACCG	(Erlotinib-DMSO)	0.3169	SPRY2
GCCCTTCGCTTCTCAGGCGG	(Erlotinib-DMSO)	4.03004	STARD3
GGAGATGAAGAGCAGGTCGA	(Erlotinib-DMSO)	3.12172	STARD3
GGACAGTGAGGAGCCCAGGG	(Erlotinib-DMSO)	-0.120783	STARD3
CGAAGAGACAGAAGGTGCGG	(Erlotinib-DMSO)	-1.15262	STARD3
GGTGCGGCGGACATCAGAGA	(Erlotinib-DMSO)	-2.54344	STARD3
AAGCGCACTCACCACCACGG	(Erlotinib-DMSO)	3.1815	TAX1BP3
TCAGAGAAGGGATTCTGGGA	(Erlotinib-DMSO)	1.30543	TAX1BP3
GAAATTCACAAGCTGCGTCA	(Erlotinib-DMSO)	1.27432	TAX1BP3
TCAAGGTGAGAACTTAATCC	(Erlotinib-DMSO)	0.863475	TAX1BP3
CATTGGAGGTGGAATCGACC	(Erlotinib-DMSO)	0.757187	TAX1BP3
ACAGGAAAGTCTAAGGGATA	(Erlotinib-DMSO)	1.40165	TIA1
TGAGATCACCAACAAAGACA	(Erlotinib-DMSO)	0.965929	TIA1
TGCCCGAGTGGTAAAAGACA	(Erlotinib-DMSO)	0.799961	TIA1
AACGCCATTCAACAGATGGG	(Erlotinib-DMSO)	0.693374	TIA1
GCCCCAGACTCACAGAGTCT	(Erlotinib-DMSO)	0.411843	TIA1
ACCTATGATGAAGAAAGCCA	(Erlotinib-DMSO)	3.58162	TIPARP
GATTGGGAACTGGAACCCTG	(Erlotinib-DMSO)	1.96315	TIPARP
ACAGTCTGGCTCAGGTTCGG	(Erlotinib-DMSO)	1.52491	TIPARP
GTCCCACTGAGGGTTTCTGA	(Erlotinib-DMSO)	1.26165	TIPARP
AAGTCATCAGGAGGAGAGGG	(Erlotinib-DMSO)	-2.12619	TIPARP
GAGCTTCAGAATGGCAAAAG	(Erlotinib-DMSO)	2.145	TMEM159
AGGTGAAGGCCAGAAACGGA	(Erlotinib-DMSO)	2.09973	TMEM159
AATGAACACCAGCAAGGTGA	(Erlotinib-DMSO)	1.9367	TMEM159
GGCCTTTATGAAGTCTCCAG	(Erlotinib-DMSO)	-0.40885	TMEM159
AGGAGCCCCAGAGTATCTCA	(Erlotinib-DMSO)	-1.25359	TMEM159
GCACACCCAGTTGGAGGTGA	(Erlotinib-DMSO)	7.45363	TMEM204
GATGGGCGCAGGCGCAGCGT	(Erlotinib-DMSO)	0.482461	TMEM204
GATGACCGTGCAGAGACTCG	(Erlotinib-DMSO)	-0.165231	TMEM204
CTGGGTGTGCCAGACGCTGG	(Erlotinib-DMSO)	-0.690509	TMEM204
ACTCATCCTCAACAACGTGG	(Erlotinib-DMSO)	-0.850542	TMEM204
GCTCTCAGAGGAAGCCCAGG	(Erlotinib-DMSO)	4.40855	TNNT3
TGAAGCCCGGAAGAAGGAGG	(Erlotinib-DMSO)	2.10954	TNNT3
GCAGAGCAGTACGAAGAAGA	(Erlotinib-DMSO)	2.08298	TNNT3
ACTGCTCCTAAGATCCCAGA	(Erlotinib-DMSO)	0.972271	TNNT3
CCTGCCCCACAGTGAACAGG	(Erlotinib-DMSO)	-0.367862	TNNT3
GCGAAGAGGCAGTAGAGACG	(Erlotinib-DMSO)	4.34526	TOR1A
GGAGCCCATCAGCCTGGGAC	(Erlotinib-DMSO)	4.06617	TOR1A
GATGTAGCCGGTGAGGACGC	(Erlotinib-DMSO)	0.724036	TOR1A
GAAGCGGAGCCTTAGCCGGG	(Erlotinib-DMSO)	-0.973238	TOR1A
GGGCTCCACCGCCTGCACCA	(Erlotinib-DMSO)	-2.32778	TOR1A
TTTGGAGAATCATCAAGCAG	(Erlotinib-DMSO)	2.45316	TPPP2
TCCAAGCTGTGCAAAGACTG	(Erlotinib-DMSO)	1.9245	TPPP2
CTCCAAACGCAGCAAACCGA	(Erlotinib-DMSO)	1.85974	TPPP2
CTAGCTGACCATGGCATCAG	(Erlotinib-DMSO)	0.695075	TPPP2
CACGATGTCCACGTCCGTGG	(Erlotinib-DMSO)	0.385481	TPPP2
TGTGCTGCCTGTGTTCACGA	(Erlotinib-DMSO)	1.83779	TRAF2
GCGGGCAGCATTATCTGGGA	(Erlotinib-DMSO)	1.64704	TRAF2
GCGGAGGACGTTTCTGCAGG	(Erlotinib-DMSO)	0.99128	TRAF2
GGCAGAAGGAGCAGTACCGG	(Erlotinib-DMSO)	0.876368	TRAF2
GTAGCAACTCCAGGGAGCCA	(Erlotinib-DMSO)	-0.248731	TRAF2
TCGGGCTGCACAGCACCAGG	(Erlotinib-DMSO)	1.32685	TRAF3
TATTGTCGGAATGAAAGCAG	(Erlotinib-DMSO)	1.31516	TRAF3
AAACTGGCGTCCCAGCACTG	(Erlotinib-DMSO)	1.12301	TRAF3
TCAGTGTGCAGCTTTAGCGG	(Erlotinib-DMSO)	0.623922	TRAF3
GCTGCATGGCGGCCCTGCTG	(Erlotinib-DMSO)	0.27856	TRAF3
AGTGGGCACTGGAGTTGCCG	(Erlotinib-DMSO)	2.38583	TRIM33
ATGGCGGAAAACAAAGGCGG	(Erlotinib-DMSO)	2.26681	TRIM33
GTGTCCAGGAGCGAGGCTGG	(Erlotinib-DMSO)	1.50871	TRIM33
GTAGTTGGTACAGGTGCTGG	(Erlotinib-DMSO)	0.799514	TRIM33
GAGGCTGGCGGTCCAGGAGG	(Erlotinib-DMSO)	-1.04475	TRIM33
GAAGTCTCCGCAAAGAGCAG	(Erlotinib-DMSO)	7.44079	TRPS1
GGTGAATGACAACCCAGACC	(Erlotinib-DMSO)	3.7121	TRPS1
CCATTCCAAAGACTTCCAGA	(Erlotinib-DMSO)	0.655037	TRPS1
AACGTTGCAAGTGAAGGCGA	(Erlotinib-DMSO)	-1.08446	TRPS1
GATGTCACCAAAGGCTACAG	(Erlotinib-DMSO)	-1.82064	TRPS1
GAAGAGCCACCTGGCAGCAA	(Erlotinib-DMSO)	2.58019	TSC1
GAGGTTGCTGGGGTTCCCAG	(Erlotinib-DMSO)	2.32461	TSC1
TAAGGGTGTGACAGATCAGG	(Erlotinib-DMSO)	1.67659	TSC1
GCAGAGCCTGTGGTTCCTCG	(Erlotinib-DMSO)	1.55838	TSC1
AGAGTGCGTACACACTGGCA	(Erlotinib-DMSO)	1.48223	TSC1
GGAGAGATACTTTGAACTGG	(Erlotinib-DMSO)	3.9916	TSC2
GCAGCTCTCCCACATCCCCG	(Erlotinib-DMSO)	3.92251	TSC2
CATGGCATGTCCGAACGAGG	(Erlotinib-DMSO)	3.19616	TSC2
GATGCTGCTCGCGATTGGCA	(Erlotinib-DMSO)	2.3716	TSC2
GATGACCAGAAGCCCCAGGA	(Erlotinib-DMSO)	1.15912	TSC2
GCCAATGGCCCGCTATGAGG	(Erlotinib-DMSO)	3.37782	TXNDC17
TGTGCTGTTCCACGGCCCGG	(Erlotinib-DMSO)	2.10399	TXNDC17
TACGGGTTCTAAGGACGCCG	(Erlotinib-DMSO)	1.46296	TXNDC17
ACACGCTCACCTCCTCATAG	(Erlotinib-DMSO)	1.26643	TXNDC17
CGAGGAGTTCCACCGGGCCG	(Erlotinib-DMSO)	-0.462599	TXNDC17
GTAACGTGGTCTTTCACCAG	(Erlotinib-DMSO)	3.29585	TXNRD1
AATGTTGTTGTAGGTCTCGG	(Erlotinib-DMSO)	1.59374	TXNRD1
GAAGCTGTACAGAATCACAT	(Erlotinib-DMSO)	1.14913	TXNRD1
CCATCTAGTTCCAAGAGGGG	(Erlotinib-DMSO)	0.526915	TXNRD1
GGGTGGGAGTGACAAAGTCC	(Erlotinib-DMSO)	0.255433	TXNRD1
ATAGATGAGGGTTACTACCA	(Erlotinib-DMSO)	4.38683	UBE2F
TTTCAGCTAACAGTAACCCC	(Erlotinib-DMSO)	4.00424	UBE2F
TGGTCTCAAAGGGTCCCGGA	(Erlotinib-DMSO)	2.76769	UBE2F
CAGCGTCCGACTCGACTCGG	(Erlotinib-DMSO)	2.09545	UBE2F
AGTAAACTGAAGCGTGACGA	(Erlotinib-DMSO)	-0.74852	UBE2F
TCGGCTTTGATGCCAGGAAC	(Erlotinib-DMSO)	1.54873	UBE2N
CGGTTACCTTGATGATCCTG	(Erlotinib-DMSO)	1.34832	UBE2N
CTGGTTCTGCCAGCAAACGC	(Erlotinib-DMSO)	1.24625	UBE2N
CGGGTTCTGACAAGATGGCC	(Erlotinib-DMSO)	0.807114	UBE2N
CCTTCCAGAAGAATACCCAA	(Erlotinib-DMSO)	-1.29381	UBE2N
GAAAGCAGGACCCAGACACG	(Erlotinib-DMSO)	5.34572	USP13
CGTCAGTCAGATTCAACCAG	(Erlotinib-DMSO)	3.11853	USP13
AGGACAATGACATCAAGCTG	(Erlotinib-DMSO)	1.5239	USP13
GGAGAGATCCCGTTCTGCTG	(Erlotinib-DMSO)	1.47983	USP13
GAATTCTGGGATGCTGAAGA	(Erlotinib-DMSO)	0.683136	USP13
GCAATAGACTGCCAATGGTG	(Erlotinib-DMSO)	1.16797	XPO4
TAGTAGTGGCAATCCCACTG	(Erlotinib-DMSO)	0.971863	XPO4
GAAGAGAAGCTAACTGGGCA	(Erlotinib-DMSO)	0.865048	XPO4
AAGAGAGACCATGATGGCGG	(Erlotinib-DMSO)	0.785459	XPO4
TGTGAGGCAGTTAACAAAGG	(Erlotinib-DMSO)	-0.119515	XPO4
GCTGTTGCCAACAAAGACAG	(Erlotinib-DMSO)	4.16967	ZBED6
ACAGCTCTTGAGATGTGCTG	(Erlotinib-DMSO)	3.54036	ZBED6
TGTAAAAGAAGTGTGAGCCG	(Erlotinib-DMSO)	-0.725697	ZBED6
CATTAGAGTCCACTGAAGGG	(Erlotinib-DMSO)	-0.993917	ZBED6
GGGAGATAAAGACACATCCA	(Erlotinib-DMSO)	-1.23256	ZBED6
GAGTACCTGGTCACAAAAGT	(Erlotinib-DMSO)	3.5994	ZBTB43
AAAGCCCAAGAACTGAGAGA	(Erlotinib-DMSO)	3.40942	ZBTB43
GAGAGATGGTGAAAATGAAG	(Erlotinib-DMSO)	2.63343	ZBTB43
GCATCATGGCTCACAAACGC	(Erlotinib-DMSO)	2.51331	ZBTB43
GGCAAGCCAGGATGGGGAGG	(Erlotinib-DMSO)	-0.718065	ZBTB43
GGCGCGATGGAGGGACTGGA	(Erlotinib-DMSO)	4.31534	ZC2HC1A
AGTAAAACCTCTCAAACCGA	(Erlotinib-DMSO)	2.68901	ZC2HC1A
GGATCATAAGAAGGTGGAGG	(Erlotinib-DMSO)	1.71237	ZC2HC1A
TCAAGCAGACAGAGAGCTGA	(Erlotinib-DMSO)	0.597275	ZC2HC1A
GATCAGGCCCTCAAAGAGGG	(Erlotinib-DMSO)	-0.321827	ZC2HC1A
CCAGTACTGTCTCCAAAACC	(Erlotinib-DMSO)	2.18796	ZC3H14
TGCAGGGTGAGATGGGGTGA	(Erlotinib-DMSO)	0.769471	ZC3H14
TCTTCTACTCACATGAGTGA	(Erlotinib-DMSO)	0.554586	ZC3H14
AAGTCAGGACCAAATGACAG	(Erlotinib-DMSO)	0.0396558	ZC3H14
TCAGTCGGGGAGATGAGAGG	(Erlotinib-DMSO)	0.0267466	ZC3H14
AGTGGTTGCTGTAACAAAGG	(Erlotinib-DMSO)	2.03809	ZNF800
TCTGTAACAATCTCAACAGG	(Erlotinib-DMSO)	1.25137	ZNF800
GTAATCCTCTGAAGAGACTG	(Erlotinib-DMSO)	0.801939	ZNF800
AGTACCGGTTACAGATACAG	(Erlotinib-DMSO)	0.784855	ZNF800
AAGTCAGCCTGCGACTCCTG	(Erlotinib-DMSO)	-1.93684	ZNF800
TGAGGAGGAAGTAGATGTGG	(Erlotinib-DMSO)	2.364	ZZZ3
ACAAGGAGTCAGTAGAACAG	(Erlotinib-DMSO)	1.89311	ZZZ3
GTGTTACAAGATCAACAGTG	(Erlotinib-DMSO)	1.71125	ZZZ3
AGATGGTTCAGGTTCTCCGG	(Erlotinib-DMSO)	-1.58627	ZZZ3
GCAGTAGTTGAAGAAATCAC	(Erlotinib-DMSO)	-2.13777	ZZZ3
